# 1 **Contact-dependent traits in *Pseudomonas syringae* B728a**

2 Monica N. Hernandez<sup>1\*,#a</sup> and Steven E. Lindow<sup>1</sup>

3 <sup>1</sup>Department of Plant and Microbial Biology, University of California, Berkeley, California,  
4 United States of America

5 <sup>#a</sup>Current Address: Department of Botany and Plant Pathology, Southern Oregon Research and  
6 Extension Center affiliated with Oregon State University, Central Point, Oregon, United States  
7 of America

8

9 \* Monica N. Hernandez

10 E-mail: [monica.hernandez@oregonstate.edu](mailto:monica.hernandez@oregonstate.edu)

11 **Short Title: Contact-dependent traits**

12

13

14

## 15 **Abstract**

16 Production of the biosurfactant syringafactin by the plant pathogen *Pseudomonas syringae*

17 B728a is a surface contact-dependent trait. Expression of *syfA*, as measured using a *gfp* reporter

18 gene fusion was low in planktonic cells in liquid cultures but over 4-fold higher in cells

19 immobilized on surfaces as varied as glass, plastic, paper, parafilm, agar, membrane filters, and

20 leaves. Induction of *syfA* as measured by GFP fluorescence was rapid, occurring within two

21 hours after immobilization of cells on surfaces. Comparison of the global transcriptome by RNA

22 sequencing of planktonic cells in a nutrient medium with that of cells immobilized for 2 hours on

23 filters placed on this solidified medium revealed that, in addition to *syfA*, 3156 other genes were

24 differentially expressed. Genes repressed in immobilized cells included those involved in  
25 quaternary ammonium compound (QAC) metabolism and transport, compatible solute  
26 production, carbohydrate metabolism and transport, organic acid metabolism and transport,  
27 phytotoxin synthesis and transport, amino acid metabolism and transport, and secondary  
28 metabolism. Genes induced in immobilized cells included *syfA* plus those involved in translation,  
29 siderophore synthesis and transport, nucleotide metabolism and transport, flagellar synthesis and  
30 motility, lipopolysaccharide (LPS) synthesis and transport, energy generation, transcription,  
31 chemosensing and chemotaxis, replication and DNA repair, iron-sulfur proteins,  
32 peptidoglycan/cell wall polymers, terpenoid backbone synthesis, iron metabolism and transport,  
33 and cell division. That many genes are rapidly differentially expressed upon transfer of cells  
34 from a planktonic to an immobilized state suggests that cells experience the two environments  
35 differently. It seems possible that surface contact initiates anticipatory changes in *P. syringae*  
36 gene expression, which enables rapid and appropriate physiological responses to the new  
37 environmental conditions. Such responses could help cells survive transitions from aquatic  
38 habitats fostering planktonic traits to attachment on surfaces, conditions that alternatively occur  
39 on leaves.

40

## 41 **Introduction**

42 *Pseudomonas syringae* has adapted to live in a variety of different environments. While most  
43 studies of this taxon have focused on its life as a plant colonist in which it grows on the surfaces  
44 of leaves and subsequently in the apoplast where it can cause disease, many strains apparently  
45 inhabit other habitats. For instance, Morris *et al.* [1] described *P. syringae* in snow, rain, and in  
46 lakes and rivers, suggesting that this bacterium is disseminated through the water cycle. All

47 bacteria are intrinsically aquatic, although many have adapted to survive in periodically dry  
48 environments, often forming biofilms on surfaces in contact with water. The very different  
49 chemical and physical properties of aquatic environments versus surfaces, which in the case of *P.*  
50 *syringae* are frequently dry, presumably select for coordinated gene expression that optimizes  
51 fitness across these different conditions. Leaf surfaces are relatively harsh habitats that exhibit  
52 strong spatially and temporally varying conditions. Water and nutrients are unevenly dispersed  
53 across leaf surfaces [2,3] and leaves experience rapid temporal fluctuations in temperature,  
54 humidity, and liquid water availability [3]. Leaf surfaces also experience high ultraviolet  
55 radiation flux [3]. In a bacterial population inhabiting such a setting, some cells might exhibit a  
56 planktonic existence within water drops containing nutrients, while other cells must contend with  
57 relatively dry surfaces.

58 Previous studies have revealed the role of syringafactin, a hygroscopic biosurfactant whose  
59 production by *P. syringae* is encoded by *syfA*, as an adaptation to the frequent absence of liquid  
60 water on leaf surfaces [4,5]. By binding water vapor trapped within the humid boundary layer  
61 and/or by binding liquid water that is transiently present on leaves, syringafactin can alleviate  
62 water stress by expanding the conditions under which liquid water is available for *P. syringae* [6].  
63 Furthermore, syringafactin does not seem to disperse in water, perhaps due to its strong  
64 hydrophobic characteristics, but instead remains immobilized onto leaf surfaces near the cells  
65 that produced it [5]. Syringafactin is thus unlikely to benefit cells immersed in water, such as  
66 those occurring in the planktonic state in aquatic environments involved in the water cycle [1].  
67 Instead, syringafactin production might maximally benefit cells in non-aquatic settings where it  
68 would improve *P. syringae* survival on surfaces subject to frequent drying. Interestingly, Burch  
69 *et al.* [7] found that cells grown on agar surfaces produced much more syringafactin and

70 expressed *syfA* at a much higher level than those in broth cultures. This observation suggests two  
71 competing hypotheses. First, *syfA* differential gene expression may be instigated by the  
72 differences in chemical or physical conditions found on an agar surface compared to that in a  
73 similar liquid culture. Alternatively, immobilization of cells on a surface may be used as a cue to  
74 immediately indicate the current or anticipated presence of environmental conditions common to  
75 leaf surfaces where the production of syringafactin would be maximally beneficial to the cell.  
76 Since Burch *et al.* [7] examined *syfA* expression only after growth of bacteria in different  
77 conditions for extended time periods (>24 hours), they could not unambiguously distinguish  
78 between these two models of gene regulation.

79 To distinguish between these two hypotheses, we determined how quickly *syfA* expression  
80 increased after planktonic cells of *P. syringae* contacted a surface and whether the nature of the  
81 surface it interacted with determined the extent of any response. It seemed likely that cells of *P.*  
82 *syringae* might benefit from anticipatory patterns of gene expression, where certain cues might  
83 be used to indicate large and rapid changes in environmental conditions. Thus, rapid or prior  
84 expression of certain traits would be highly beneficial in adapting to large changes in habitat  
85 characteristics. In this case, we predicted that changes in gene expression associated with  
86 transition from a planktonic to a surface-associated habitat such as a leaf would be linked to  
87 perception of a surface that might be imminently dry. While there has been interest in such  
88 surface sensing in bacteria [8, 9, 10, 11, 12] little is known of the mechanism by which cells  
89 sense surfaces and there are few studies that have examined rapid changes in gene expression  
90 that could be associated with perception of a surface [13]. We therefore explored the rapid  
91 changes in the global transcriptome of B728a soon after planktonic cells became sessile on a  
92 surface. The large number of genes that we find to undergo changes in gene expression upon the

93 transition from planktonic to sessile life suggest that surface sensing could be a major cue  
94 controlling adjustment of *P. syringae* to the varying habitats it colonizes on leaf surfaces and  
95 elsewhere.

## 96 **Materials and methods**

### 97 **Bacterial strains and growth conditions**

98 *Pseudomonas syringae* B728a strains were grown on King's medium B (KB) plates containing  
99 1.5% technical agar or in KB broth lacking agar [14]. Antibiotics were used at the following  
100 concentrations ( $\mu\text{g/ml}$ ): spectinomycin (100), kanamycin (50), and tetracycline (15) as  
101 appropriate.

### 102 **Quantification of GFP fluorescence in individual bacterial cells**

103 *P. syringae* B728a cells harboring a plasmid in which the *syfA* promoter was fused to a  
104 promoterless *gfp* reporter gene [7], were grown in KB broth until they reached a density of  $10^8$   
105 cells/ml as determined by Optical Density ( $\lambda = 600 \text{ nm}$ ).  $10 \mu\text{l}$  of cells were then placed onto  
106 various surfaces. To subsequently remove cells from these surfaces, moistened cotton swabs  
107 were used to scrub off the cells. The swabs were then placed into microcentrifuge tubes  
108 containing  $100 \mu\text{l}$  of water and vortexed to re-suspend the cells.  $5 \mu\text{l}$  of cell suspension from  
109 each treatment was applied to glass slides for fluorescence microscopy to quantify the GFP  
110 fluorescence of individual cells. Cells were visualized at 100X magnification with a M2  
111 AxioImager. A GFP filter set was used to view cells, and images were captured in black and  
112 white format using a 12-bit Retiga camera. The software iVision was used to identify all

113 bacterial cells in an image and to quantify the average pixel intensity of each object identified as  
114 in other studies [6]. Aggregates of bacterial cells and extraneous particles were identified by  
115 visual examination and marked for exclusion before image processing.

## 116 **RNA isolation**

117 Bacterial cells were grown with shaking in KB broth at 28°C until cultures reached a cell density  
118 of  $5 \times 10^8$  cells/ml. Three replicate cultures were used. 300 µl of each culture was then applied to  
119 a 0.4 µm Isopore® membrane filter and excess liquid was removed by exposing the filter to a  
120 vacuum source for 5 seconds. Filters were then immediately placed onto KB plates to incubate at  
121 28°C for two hours while broth cultures were returned to a shaker and incubated at 28°C for two  
122 more hours. Cells in broth cultures were harvested by pipetting 1 ml of suspension into a 15 mL  
123 conical tube containing 125 µl ice-cold EtOH/Phenol stop solution (5% water-saturated phenol  
124 (pH<7.0) in ethanol). Filters were immersed in the EtOH/Phenol stop solution and cells were  
125 harvested by sonication for 30 seconds followed by vortexing for 20 seconds to ensure complete  
126 cell detachment from the filters. Cells were then collected by centrifugation at 12,000 rpm  
127 (13,800 x g) for five minutes at 4°C. Supernatant was decanted and the cells were frozen in  
128 liquid nitrogen and stored at -80°C until RNA isolation. RNA isolation was performed using a  
129 Direct-zol™ RNA Kit (Zymo Research). To isolate RNA, 600 µl of TRI Reagent® (Sigma-  
130 Aldrich) was then added to the pelleted cells. An equal volume of ethanol (100%) was added to  
131 the cells in TRI Reagent® and mixed thoroughly. The mixture was transferred into a Zymo-  
132 Spin™ IICG Column (Zymo Research) in a collection tube and centrifuged. The flow-through  
133 was discarded and the column was transferred into a new collection tube. For DNase I treatment,  
134 400 µl RNA Wash Buffer (Zymo Research) was added to the column which was then  
135 centrifuged. 5 µl DNase I (6 U/µl) (Zymo Research) and 75 µl DNA Digestion Buffer (Zymo

136 Research) were then added to the tube and mixed. The mix was added directly to the column  
137 matrix and incubated at room temperature (20-30°C) for 15 minutes. 400 µl Direct-zol™ RNA  
138 PreWash (Zymo Research) was then added to the column and then centrifuged. The flow-  
139 through was discarded and the step was repeated once more. 700 µl RNA Wash Buffer (Zymo  
140 Research) was then added to the column and subsequently centrifuged for two minutes. The  
141 column was then transferred into a RNase-free tube. To elute RNA, 50 µl of DNase/RNase-Free  
142 Water (Zymo Research) was added directly to the column matrix which was then centrifuged.  
143 RNA was stored frozen at -80°C.

144

## 145 **mRNA sequencing**

146 1 µl of each sample was diluted into 4 µl of RNase free water and submitted to the Vincent J.  
147 Coates Genomics Sequencing Laboratory at UC Berkeley where Ribo-Zero was used for rRNA  
148 removal. RNA abundance and purity were determined using a 2100 Bioanalyzer (Agilent  
149 Technologies) and quantified using Qubit (Invitrogen). After reverse transcription, shearing of  
150 cDNA, size fractionation, and Illumina library production, the Vincent J. Coates Genomics  
151 Sequencing Laboratory samples were sequenced using an Illumina HiSeq4000 platform with 50  
152 base pair, single-end reads. Three biological replicates were sequenced per treatment. Reads  
153 were uploaded to Galaxy [15] and cleaned using Trimmomatic [16]. Reads were aligned to the  
154 *Pseudomonas syringae* B728a genome [17] using Salmon Transcript Quantification [18] in  
155 Galaxy. The program edgeR in R was then used to assess the statistical significance of  
156 differential gene expression [19]. Gene expression levels were normalized using a weighted  
157 trimmed mean of M values (TMM; where M is the log expression ratio per gene between  
158 treatments) [20]. Empirical Bayes estimation and tests based on the negative binomial

159 distribution were then used to determine significance [20]. A gene was considered significantly  
160 differentially regulated if the p-value for the difference in relative expression between the filter  
161 treatment and the liquid treatment was less than 0.001.

162

## 163 **Statistical analysis**

164 The hypergeometric distribution was performed in R [21] to test for significance of functional  
165 category enrichment [22]. All p-values were adjusted using the Bonferroni correction [23] and  
166 the Benjamini-Hochberg correction [24] in R.

167

## 168 **Results**

### 169 ***SyfA* induction occurs rapidly upon surface contact**

170 If the *syfA* gene is regulated directly as a response to contact with a surface, we would expect  
171 gene induction to occur shortly after surface contact. To test how rapidly *syfA* was induced after  
172 planktonic cells were transferred to various surfaces, we monitored the expression of *syfA* in *P.*  
173 *syringae* B728a harboring a plasmid containing the *syfA* promoter fused to a promoterless *gfp*  
174 reporter gene by assessing the GFP fluorescence of individual cells by epifluorescence  
175 microscopy. Planktonic cells from broth cultures were applied to three surfaces: (1) agar-  
176 solidified King's medium B (KB) media, (2) a 0.4  $\mu\text{m}$  polycarbonate Isopore® filter that was  
177 placed on KB agar, and (3) a 0.4  $\mu\text{m}$  Isopore® filter floated on the surface of a small quantity of  
178 KB broth. Since nutrient solution diffused through the filters, wetting the filters in these settings,  
179 we presume that the cells experienced similar levels of most nutrients while immobilized on the



180 filters as those remaining in broth cultures but experienced different physical conditions.  
181 Planktonic cells that remained in broth cultures served as a control. We compared gene  
182 expression of cells on filters placed on KB agar and KB broth to test whether chemical  
183 components of the agar, rather than simply the physical change it elicited, contributed to  
184 induction of *syfA* expression as seen by Burch *et al.* [7]. By two hours after transfer to each of  
185 the solid surfaces, cells exhibited significantly greater GFP fluorescence than those remaining in  
186 the broth cultures (Fig 1). Similar levels of *syfA* induction occurred on all surfaces (Fig 1). Thus,  
187 *syfA* induction clearly occurs rapidly upon encountering a surface and elevated expression on  
188 agar appears to be due to the exposure of cells to a surface rather than any chemical components  
189 of the agar.

190 **Fig 1. Induction of *syfA* expression in cells of *Pseudomonas syringae* B728a as a function of**  
191 **time.**

192 Gene expression is estimated as the mean GFP fluorescence of individual cells harboring a  
193 plasmid in which the *syfA* promoter was fused to a *gfp* reporter gene when harvested from these  
194 surfaces at the various times shown on the abscissa. 7,038 cells were evaluated in total for  
195 control cells that remained in a broth culture (blue); 3,068 cells were evaluated after application  
196 to agar (green); 10,184 cells were evaluated after application to filters on an agar surface  
197 (yellow); and 3,791 cells were evaluated after application to a filter placed on plastic (orange).  
198 The vertical bars represent the standard error of the mean GFP fluorescence for a given cell.

## 199 ***SyfA* is induced in cells on a variety of solid surfaces**

200 Given that *syfA* induction quickly followed transfer of planktonic cells to various surfaces with  
201 abundant nutrient resources, we explored whether any particular physical parameters such as

202 hydrophobicity or roughness were associated with the induction process. Since *P. syringae*  
203 B728a was isolated from leaf surfaces and is highly fit as an epiphyte [25, 26], we tested the  
204 hypothesis that leaf surfaces would confer the most rapid or largest contact-dependent induction  
205 of this gene. By exposing cells to various types of solid surfaces we further explored whether  
206 *syfA* expression was regulated by contact with a surface per se as opposed to a chemical cue.  
207 Planktonic cells from KB broth cultures were applied to polycarbonate, paper, parafilm, excised  
208 leaves, water agar, and Isopore®, Durapore®, and Teflon® filters. Cells all exhibited at least 2-  
209 fold greater GFP fluorescence than those of the planktonic cells when assessed six hours after  
210 application to these surfaces (Fig 2). Little difference in GFP fluorescence was observed among  
211 cells placed on the various solid surfaces, suggesting that neither surface type-dependent  
212 chemical cues nor the physical properties of the surface on which cells were immobilized  
213 strongly influenced the induction of *syfA*.

214 **Fig 2. The expression of *syfA* increases rapidly after immobilization of cells of *Pseudomonas***  
215 ***syringae* B728a.**

216 Gene expression is estimated as the mean GFP fluorescence of individual cells harboring a  
217 plasmid in which the *syfA* promoter was fused to a *gfp* reporter gene when harvested 6 hours  
218 after application to glass (green), polycarbonate plastic (yellow), paper (orange), parafilm (red),  
219 bean leaves (purple), agar (grey), Isopore filters (pink), Durapore filters (aqua), Teflon filters  
220 (brown), or recovered from broth cultures at the time of application to surfaces or after 6 hours  
221 (blue). The vertical bars represent the standard error of the mean GFP fluorescence for a given  
222 cell.

223

224 **RNA sequencing of *P. syringae* B728a reveals many genes**  
225 **differentially regulated in cells transferred to a filter surface versus**  
226 **in liquid culture**

227 Given that cells of *P. syringae* exhibited large increases in *syfA* expression within two hours of  
228 transfer to a variety of solid surfaces, we performed RNA sequencing to determine the extent to  
229 which other genes exhibit contact-dependent gene expression. The transcriptome of cells grown  
230 in KB broth was compared to those placed on filters atop KB agar for 2 hours. RNA sequencing  
231 returned between 20 and 40 million reads per sample (Fig S1). As expected, a wide range of  
232 reads were recovered for a given gene (Fig S2). A heatmap revealed that while patterns of gene  
233 regulation were similar among replicates in which cells were either planktonic or immobilized on  
234 a filter, gene expression differed strongly between cells in these two conditions (Fig 3). Much of  
235 the variation in relative gene expression levels of the average gene was thus associated with the  
236 environment of the cells before RNA was harvested rather than other factors.

237

238 **Fig 3. Heat map illustrating different patterns of gene expression in cells of *Pseudomonas***  
239 ***syringae* B728a.**

240 Heat map illustrating different patterns of gene expression in cells of *Pseudomonas syringae*  
241 B728a 2 hours after application to a filter surface compared to that in broth culture. Differential  
242 up-regulation of genes is shown in yellow while down-regulation is depicted in red.

243

244 Expression of 1,390 genes was up-regulated in cells on the filter surface compared to those in  
245 broth media, while expression of 1,766 genes was down-regulated on filter surfaces compared to

246 that in broth (Fig 4). Of the 1,390 genes that were induced on filter surfaces, 881 were induced  
247 more than 2-fold while 509 exhibited lesser induction. Of the 1,766 genes that were repressed on  
248 filter surfaces, 1,138 were repressed more than 2-fold while 628 were repressed less than 2-fold.  
249 In total, 3,156 genes (60.46% of the *P. syringae* B728a genome) were found to be differentially  
250 expressed in cells on the filter surface compared to those in broth culture (Fig 4). There was no  
251 apparent relationship between the absolute level of expression of a gene and the likelihood that it  
252 would exhibit differential expression in these two settings (Fig S3).

253

254 **Fig 4. Volcano plot illustrating the differential expression of genes in *Pseudomonas syringae***  
255 **B728a.** Volcano plot illustrating the differential expression of genes in *Pseudomonas syringae*  
256 B728a 2 hours after application to a filter surface. Genes that are significantly differentially  
257 expressed compared to that in broth culture are shown in red, and those that do not differ are  
258 shown in black.

259

## 260 **Functional category analysis**

261 We grouped the differentially regulated genes into functional categories to better establish those  
262 processes that were most differentially expressed in planktonic and immobilized cells (Tables 1  
263 and 2). Twice as many functional gene categories were enriched in genes that were significantly  
264 up-regulated in immobilized cells than those that were down-regulated. The following gene  
265 functional categories were examined in further detail:

266

267

268 **Table 1. Functional gene categories preferentially up-regulated in cells of *Pseudomonas***  
269 ***syringae* B728a 2 hours after application to a filter surface.**

| Gene Category                              | Bonferroni adjusted p-value | Benjamini-Hochberg adjusted p-value |
|--------------------------------------------|-----------------------------|-------------------------------------|
| Translation                                | 1.11E-18                    | 1.11E-18                            |
| Siderophore synthesis and transport        | 4.75E-09                    | 2.38E-09                            |
| Nucleotide metabolism and transport        | 1.12E-06                    | 3.73E-07                            |
| Flagellar synthesis and motility           | 2.44E-03                    | 6.11E-04                            |
| Lipopolysaccharide synthesis and transport | 9.16E-03                    | 1.83E-03                            |
| Energy generation                          | 0.02                        | 2.63E-03                            |
| Transcription                              | 0.04                        | 0.04                                |
| Chemosensing and chemotaxis                | 0.06                        | 7.15E-03                            |
| Replication and DNA repair                 | 0.12                        | 0.01                                |
| Iron-sulfur proteins                       | 0.19                        | 0.02                                |

|                                     |      |      |
|-------------------------------------|------|------|
| Peptidoglycan/cell wall<br>polymers | 0.19 | 0.02 |
| Terpenoid backbone<br>synthesis     | 0.24 | 0.02 |
| Iron metabolism and<br>transport    | 0.25 | 0.02 |
| Cell Division                       | 0.59 | 0.04 |

270 The significance of functional category enrichment was assessed using the hypergeometric distribution  
271 (Castillo-Davis and Hartl, 2003).

272

273

274

275

276

277

278

279

280

281 **Table 2. Functional gene categories of *Pseudomonas syringae* B728a preferentially down-**  
282 **regulated in cells 2 hours after application to a filter surface.**

283

| <b>Gene Category</b>                                        | <b>Bonferroni adjusted<br/>p-value</b> | <b>Benjamini-Hochberg<br/>adjusted p-value</b> |
|-------------------------------------------------------------|----------------------------------------|------------------------------------------------|
| Quaternary ammonium<br>compound metabolism and<br>transport | 2.19E-08                               | 2.19E-08                                       |
| Compatible solute synthesis                                 | 2.33E-06                               | 1.17E-06                                       |
| Carbohydrate metabolism and<br>transport                    | 1.72E-05                               | 5.74E-06                                       |
| Organic acid metabolism and<br>transport                    | 8.84E-05                               | 2.21E-05                                       |
| Phytotoxin synthesis and<br>transport                       | 1.16E-04                               | 2.32E-05                                       |
| Amino acid metabolism and<br>transport                      | 0.01                                   | 1.77E-03                                       |
| Secondary metabolism                                        | 0.01                                   | 1.01E-03                                       |

284 The significance of functional category enrichment was assessed using the hypergeometric distribution  
285 (Castillo-Davis and Hartl, 2003).

286 **Translation.** Many genes encoding the 30S and 50S ribosomal protein subunits were induced  
287 on the filter surface, as were genes encoding the elongation factor proteins Ts, P, Tu, and G.  
288 Many genes encoding t-RNA synthetases were also induced. It thus appeared that translation as a  
289 whole may have accelerated upon transition of cells from a planktonic to an immobilized state.

290 **Siderophore synthesis and iron metabolism.** Many genes involved in siderophore  
291 synthesis and transport were induced on the filter surface. Many genes such as *pvdS*, *pvdG*, *pvdL*,  
292 *pvdI*, *pvdJ*, *pvdK*, *pvdD*, *pvdE*, *pbdO*, *pvdN*, *pvdT*, and *pvdR* were involved in regulation of  
293 pyoverdine production and its transport. Many genes involved in achromobactin regulation,  
294 synthesis, and transport including *acsG*, *acsD*, *acsE*, *yhca*, *acsC*, *acsB*, *acsA*, *carA-2*, *cbrB-2*,  
295 and *cbrC-2* were also induced. Many genes involved in iron metabolism and transport were also  
296 induced on the filter surface. This included the genes *fecE*, *fecD*, *fecC*, *fecB*, *fecA*, *fecR*, and the  
297 RNA polymerase ECF sigma factor *fecI*. These results suggest that iron became less available on  
298 the filter surfaces than in broth, perhaps due to diffusional limitations associated with the lack of  
299 mixing of cells as would occur in a liquid medium. Alternatively, iron might commonly be less  
300 available on the natural surfaces on which *P. syringae* typically inhabits, such as leaf surfaces,  
301 and the filter mimicked physical cues that the bacteria might use to anticipate transition into such  
302 low iron environments.

303 **Nucleotide metabolism and transport.** Numerous genes involved in nucleotide  
304 metabolism and transport were induced in immobilized cells. This included many genes involved  
305 in purine and pyrimidine metabolism such as *purA*, *purT*, *purC*, *purF*, *purB*, *purM*, *purN*, *purU-3*,  
306 *purH*, *purD*, *purK*, *purE*, and *pyrB*, *pyrR*, *pyrH*, *pyrG*, *pyrF*, *pyrD*, *pyrC-2* respectively. As with  
307 the apparent increase in translational activity seen upon transition of planktonic cells to those on



308 surfaces, increased transcription might be expected to also be linked to such increases, requiring  
309 higher rates of nucleotide synthesis. Almost all genes with significant differential expression  
310 involved in cell division were also induced on the filter surface. This included the cell division  
311 proteins FtsK, FtsQ, and FtsL as well as the rod-shape determining proteins MreD and MreC.  
312 MrdB, a cell cycle protein, was also induced.

313 **Flagellar synthesis and motility.** Many genes encoding flagellar biosynthesis proteins,  
314 flagellar basal body proteins, and flagellar hook-associated proteins were induced on the filter  
315 surface. The gene encoding the anti-sigma-28 factor FlgM was also induced more than 2-fold.  
316 Genes encoding the flagellar motor proteins MotA, MotB, MotC, and MotD were induced as  
317 well. While it would be expected that planktonic cells of *P. syringae* would be motile, higher  
318 levels of expression of motility genes on leaves compared to that in broth cultures has been  
319 previously noted [26] and would likely require higher levels of flagellar production and repair [9].

320 **Lipopolysaccharide synthesis and transport.** All the genes with significant differential  
321 expression that are involved in lipopolysaccharide (LPS) synthesis and transport were induced in  
322 cells immobilized on filters except *arnB* and *arnA*. Most of these induced genes are involved in  
323 LPS transport and lipid A biosynthesis.

324 **Energy generation.** Many genes encoding proteins involved in oxidative phosphorylation  
325 were expressed at a higher level on filter surfaces than in broth cultures. Such genes included  
326 *cyoA*, *cyoB*, *cyoC*, and *cyoD*, all of which encode cytochrome c oxidase subunits, as well as *ccoN*,  
327 *ccoO*, and *ccoP* which encode cytochrome c oxidase cbb3-type subunits. Many genes encoding  
328 F<sub>0</sub>F<sub>1</sub> ATP synthase subunits were induced as well.

329 **Transcription.** Similar to that seen for nucleotide synthesis, nearly all of the genes involved  
330 in transcription that were differentially expressed were induced on filters compared to that in  
331 broth cultures, with the exception of Psyr\_4263. Genes up-regulated on surfaces included those  
332 encoding the transcription termination factor Rho, the transcription elongation factors GreB and  
333 GreA, the transcription anti-termination proteins NusB and NusG, and the DNA-directed RNA  
334 polymerase subunits RpoA, RpoC, and RpoB.

335 **Chemosensing and chemotaxis.** Many genes involved in chemosensing and chemotaxis  
336 were induced in cells attached to on the filter surface. Many of the induced genes encoded  
337 histidine kinases. Interestingly, Psyr\_1306, Psyr\_1307 and Psyr\_1308, which encode homologs  
338 to WspD, WspE, and WspF respectively, were all down-regulated on the filter surface.  
339 Psyr\_1309, which encodes the homolog for WspR, was also down-regulated. However, this latter  
340 gene was assigned to the cyclic diguanylate (cyclic di-GMP) cyclase proteins functional group.

341 **Replication and DNA repair.** Most of the genes involved in replication and DNA repair  
342 were induced on the filter surface. This included Psyr\_1408, Psyr\_1409, and Psyr\_1410 which  
343 encode RuvC, RuvA, and RuvB respectively. These genes are also involved in homologous  
344 recombination in addition to DNA repair.

345 **Iron-sulfur proteins.** Many genes encoding iron-sulfur proteins were induced on the filter  
346 surface. This included *dsbE* which is involved in cytochrome synthesis.

347 **Peptidoglycan/cell wall polymers.** All of the genes involved in encoding  
348 peptidoglycan/cell wall polymers that were differentially expressed on filters compared to broth

349 cultures were induced on the filter surface. Most of these genes are involved in peptidoglycan  
350 biosynthesis.

351 **Terpenoid backbone synthesis.** Many genes involved in terpenoid backbone synthesis  
352 were induced in cells applied to filter surfaces. This included genes that are part of the  
353 deoxyxylulose pathway of terpenoid biosynthesis.

354 **Quaternary ammonium compound metabolism and transport.** Surprisingly, all  
355 genes with differential expression that are required for quaternary ammonium compound (QAC)  
356 metabolism and transport were repressed on the filter surface. This included genes encoding  
357 proteins involved in glycine betaine, choline, and carnitine metabolism and transport. The gene  
358 *betI*, encoding the transcriptional regulator of choline degradation, was also down-regulated.  
359 Similar to that seen for genes involved in QAC metabolism, all of the genes that had significant  
360 differential expression that are involved in compatible solute synthesis were repressed on the  
361 filter surface. Many of these genes contribute to either trehalose or N-acetylglutaminylglutamine  
362 amide (NAGGN) synthesis. These compounds are solutes that are part of the cellular response to  
363 water stress.

364

365 **Carbohydrate metabolism and transport.** Many of the genes involved in carbohydrate  
366 metabolism and transport were repressed in immobilized cells on filters. This included genes  
367 involved in trehalose, mannose, fructose, ribose, arabinose, maltose, manitol, and sorbitol  
368 transport as well as genes involved in the pentose phosphate pathway.

369

370 **Organic acid metabolism and transport.** Many of the genes involved in organic acid  
371 metabolism and transport were also repressed on the filter surface. This included the genes *phnF*,  
372 *phnG*, *phnH*, *phnI*, *phnJ*, *phnK*, *phnL*, *phnM*, *phnN*, and *phnP* which are all involved in  
373 phosphonate metabolism and transport. The transcriptional regulator of vanillate metabolism,  
374 *vanR*, was also down-regulated.

375 **Phytotoxin synthesis and transport.** All of the differentially expressed genes involved in  
376 phytotoxin synthesis and transport were repressed in cells applied to filters. These genes included  
377 *sala*, which is the regulator of syringomycin, as well as *slyA*, the regulator of syringolin A  
378 production. Other genes involved in syringolin synthesis and transport (*slyB*, *slyC*, *slyD*, and  
379 *slyE*), syringomycin synthesis and transport (*syrE*, *syrC*, *syrB1*, *syrP*, and *syrD*), and  
380 syringopeptin synthesis and transport (*sypA*, *sypB*, and *sypC*). Syringomycin and syringopeptin  
381 secretion proteins PseA and PseB were also down-regulated in immobilized cells on filters.

382 **Amino acid metabolism and transport.** Many of the genes involved in amino acid  
383 metabolism and transport were repressed on the filter surface. This included genes involved in  
384 gamma-aminobutyric acid (GABA) metabolism (*gabT-2*, *gabD-2*, *gabT-1*, *gabD-1*, *gabD-3*, and  
385 *gabP*).

386  
387 **Secondary metabolism.** All of the differentially expressed genes involved in secondary  
388 metabolism were repressed on the filter with the noteworthy exception of Psyr\_2575, Psyr\_2576,  
389 and Psyr\_2577 which encode SyfR, SyfA, and SyfB, responsible for the regulation of and  
390 production of syringafactin, respectively. It was therefore intriguing to find that syringafactin

391 production was the sole example of secondary compounds that were not down-regulated when  
392 cells transitioned from a planktonic to a sessile state.

## 393 **Discussion**

394 The remarkably strong and rapid induction of *syfA* in *P. syringae* B728a in cells transferred from  
395 broth culture to any of several different types of surfaces encouraged us to test the hypothesis  
396 that a variety of other traits would exhibit similar surface-dependent changes in expression. The  
397 rapidity with which *syfA* induction occurred on all of the various surfaces makes it unlikely that  
398 cells modified their local microhabitat in any substantial way. We thus presume that assessment  
399 of transcriptional changes within two hours after transfer to these surfaces reflected contact-  
400 specific gene regulation rather than changes responsive to altered microenvironments that have  
401 been seen in studies of biofilms. Such studies typically examined bacteria many hours after  
402 attachment, usually after a thick biofilm had formed on surfaces [27, 28, 29]. We also presume  
403 that regulatory shifts that occurred shortly after contact with a surface also were distinct from  
404 those conditioned by other secondary events such as cell-cell contact or cell density-dependent  
405 regulatory processes. Given the brief period of immobilization of cells on a filter surface, we  
406 were surprised to find such a high proportion of the genes in *P. syringae* B728a to respond to this  
407 transition. In addition to induction of the genes conferring syringafactin production and its  
408 regulation (*syfA*, *syfB*, and *syfR*), it was striking that genes involved in many other cellular  
409 processes such as flagellar synthesis and motility, LPS synthesis and transport, chemosensing  
410 and chemotaxis, siderophore synthesis and transport, and DNA replication and repair underwent  
411 changes in expression. While coherent arguments could be made for why some of these  
412 processes should exhibit contact-dependent expression, the responses of many other processes

413 remain enigmatic. The induction of many genes required for the synthesis of peptidoglycan/cell  
414 wall polymers and LPS synthesis and transport seen in the immobilized cells (Table 1) suggests  
415 that, like that of other bacteria for which surface contact-dependent gene expression has been  
416 investigated [30, 31], *P. syringae* may also utilize a mechanosensitive pathway for sensing a  
417 surface that involves disruption and repair of the cell envelope. Previous studies have suggested  
418 that cells experience cell wall damage when they contact a surface [8, 30]. Peptidoglycan and  
419 cell wall synthesis might be induced to repair any damage that resulted from such an encounter.  
420 Moreover, the bacterial outer membrane also contains abundant lipopolysaccharides that could  
421 also be disrupted during physical binding of cells to a hard surface, making LPS synthesis  
422 essential [9, 32, 33]. Interestingly, this initial cell wall stress may also be a cue for the  
423 differential expression of other surface-regulated genes as suggested by others [8].

424 Historically, it has been common to study bacteria in broth cultures. While it is presumed that  
425 such cultures are more homogeneous and facilitate studies of coordinated patterns of gene  
426 expression etc., many aspects of the manner in which microorganisms interact with their  
427 environment cannot be studied in such a setting [8, 11, 12]. For example, low nutrient conditions  
428 in broth cultures are typically associated with both high cell densities and low oxygen levels. In  
429 contrast, cells on the leaf surface would typically experience low nutrient conditions in a fully  
430 aerobic environment. Although *P. syringae* B728a can be found in aquatic environments, it also  
431 colonizes the surface of leaves, a decidedly different environment where it encounters both low  
432 nutrient concentrations and high oxygen levels [1, 3, 34]. Furthermore, the study of bacterial  
433 adaptations to life on surfaces has focused almost entirely on the process of biofilm formation in  
434 aquatic settings [27, 28, 29]. The three-dimensional aggregates of bacteria that often form in  
435 such aqueous environments, in which nutrients are provided by flowing liquids, are almost

436 certainly very different from the monolayers of bacteria that typically develop on leaf surfaces  
437 [35, 36]. Delivery of soluble nutrients in flowing liquids is probably an exceptional situation on  
438 leaves [2, 3]. In addition, biofilm formation in a flowing liquid environment occurs over  
439 relatively long periods of time. Cells are acquired by, or develop within, a biofilm over a long  
440 period of time, during which the nature of the environment within the biofilm changes  
441 dramatically, with large spatiotemporal variations [27]. For both practical and other reasons,  
442 studies of aquatic biofilms typically have examined gene regulation only 24 hours or later after  
443 biofilm initiation [27, 29]. Few studies have addressed very early stages of biofilm formation  
444 such as this study.

445 Genes involved in both transcription and translation were typically induced upon cell  
446 immobilization (Table 1). Given that the transcription of a large number of genes was rapidly  
447 increased upon transitioning from a planktonic to a sessile state (Figs 3 and 4), there would need  
448 to be a corresponding increase in translation to produce the corresponding proteins. Likewise,  
449 genes linked to nucleotide metabolism and transport, transcription, and replication and DNA  
450 repair (Table 1) were also induced upon immobilization of cells. It would follow that higher  
451 rates of nucleotide synthesis or procurement would be needed to support RNA synthesis  
452 associated with the elevated transcription. The apparent elevated DNA replication associated  
453 with cell immobilization would also require increased expression of genes enabling nucleotide  
454 metabolism.

455 Studies have suggested that cells on leaf surfaces and attached to apoplastic surfaces experience  
456 oxidative stresses resulting from plant defenses [37, 38, 39]. These compounds, including  
457 hydroxyl radicals created when iron reacts with H<sub>2</sub>O<sub>2</sub>, can be damaging to iron-sulfur proteins  
458 and DNA [39]. Genes involved in iron-sulfur protein synthesis and DNA repair would be

459 expected to be induced on surfaces, as we observed here, if cells anticipated such a chemical  
460 assault on plant surfaces and linked their expression with surfaces per se.

461 Genes required for siderophore synthesis and transport as well as iron metabolism and transport,  
462 typically activated under conditions of low iron availability [26] were also induced in  
463 immobilized cells (Table 1), suggesting that iron was less available to cells on the filter surface  
464 than in broth media. Access to the limited iron in any environment would be expected to be  
465 determined by its delivery to the vicinity of the cell by diffusion. Such a process would be  
466 diminished in the two-dimensional environment on the surface of filters compared to the three-  
467 dimensional habitat of cells immersed in a liquid medium. Cells affixed to a surface also would  
468 be unable to move in response to local resource depletion to gain access to such molecules [13].  
469 Given that iron is commonly present in low amounts on the natural surfaces that *P. syringae*  
470 typically inhabits, such as leaves [40, 41] immobilization of cells on filters might have mimicked  
471 this physical cue to anticipate transition into such low-iron environments.

472 The many genes involved in flagellar synthesis and motility and chemosensing and chemotaxis  
473 that were surface induced (Table 1) would be important in the colonization of leaf surfaces that  
474 harbor limited amounts of nutrient resources that are also heterogeneously dispersed [2, 42, 43].  
475 Moreover, pathogenic bacteria such as *P. syringae* often eventually colonize the leaf apoplast - a  
476 process requiring cells to move towards and enter a stomate or breaks in the cuticular surface of  
477 leaves to access this intercellular habitat [34]. The up-regulation of motility and chemotaxis  
478 genes was also observed in a study examining the transcriptome of *P. syringae* B728a on leaf  
479 surfaces and apoplast when compared to that in a liquid medium *in vitro* [26]. Direct support for  
480 the importance of cell motility of *P. syringae* on leaves was provided by studies of Haefele and  
481 Lindow [43] who showed that non-motile mutants were much less fit than motile cells.



482 Surprisingly, genes involved in QAC metabolism and compatible solute synthesis tended to be  
483 repressed in cells on filter surfaces (Table 2). Such compounds often serve as compatible solutes  
484 whose purpose is to maintain equilibrium of water availability between the inside of the cell and  
485 the outside environment. Thus, genes involved in compatible solute synthesis would be expected  
486 to be up-regulated in cells experiencing osmotic or matric stresses [26]. Previous studies have  
487 suggested that the leaf surface is often sufficiently dry that compatible solute synthesis is needed  
488 to combat matric stress [44, 45]. However, since this experiment was performed on filters placed  
489 on nutrient agar, the water status of cells upon such a surface is uncertain. While one might  
490 imagine such a surface to be a drier habitat than what cells suspended in the corresponding broth  
491 medium might experience, it is likely that this surface would be moister than leaf surfaces  
492 typically are. The disruption of the gel matrix that would occur by application of a filter on an  
493 agar surface might release free water in a process known as syneresis [46]. Indeed, filters  
494 immediately appeared transiently wet after application to the agar surface. While the leaf surface  
495 is composed of a waxy, hydrophobic cuticle to prevent the release of water vapor [47, 48], a  
496 membrane filter is by definition quite porous and would enable the movement of water onto the  
497 filter surface where it could wet cells.

498 The down-regulation of genes encoding carbohydrate metabolism and transport, organic acid  
499 metabolism and transport, and amino acid metabolism and transport (Table 2) upon  
500 immobilization of cells was surprising. While we expected nutrients to move from the agar  
501 matrix through the filter to the attached cells on top, it is likely that the rate at which nutrients are  
502 replenished by this diffusional process would be slower than that occurring during mixing of  
503 cells in a planktonic state in the corresponding shaken broth medium. It might thus be expected  
504 that the immobilized cells could experience a locally more nutrient-limited environment than

505 those of the planktonic cells. The common observation of slower growth of bacteria on the  
506 surface of membranes placed on agar media than in shaken broth of the same composition also  
507 supports such a model. Interestingly it has been noted that many genes in *P. syringae* involved in  
508 amino acid metabolism and transport were repressed on the leaf surface [26].

509 Surprisingly, genes involved in phytotoxin synthesis and transport as well as many other genes  
510 enabling production of other secondary metabolites were repressed on the filter surface (Table  
511 2). Such compounds often act as virulence factors. We had expected that contact with a surface  
512 would serve as a cue to *P. syringae* that it had encountered a potential host plant after  
513 transitioning from a planktonic existence, and thus one would have expected such compounds to  
514 be expressed. However, the large majority of *P. syringae* cells in the phyllosphere of healthy  
515 leaves usually occur only as epiphytes on the surface of leaves rather than within the apoplast  
516 [49]. Thus, when *P. syringae* colonizes the leaf surface it seldom interacts directly with living  
517 plant cells and thus would not be expected to benefit from the production of various toxins.  
518 Rather, such toxins would prove beneficial only after it had entered the leaf apoplast [34] and  
519 their expression is highly elevated in the apoplast, but not on the leaf surface [26]. We  
520 hypothesize that a secondary signal, indicative of conditions within the leaf, and not a surface  
521 itself, is required for expression of such virulence factors. Arbutin and other compounds that are  
522 not common on leaf surfaces have also been shown to be required for the induction of toxins  
523 such as syringomycin in *P. syringae* [50]. Such secondary cues would prevent the costly  
524 production of toxins when they would not be beneficial.

525 One of the few studies that have examined gene expression in bacterial cells soon after surface  
526 attachment assessed gene expression in *Escherichia coli* strain CSH50 by microarray analysis  
527 one, four, and eight hours after planktonic cells had attached to mannose agarose beads

528 submerged in cultures [13]. This study revealed that changes in gene expression upon  
529 immobilization of cells were both very rapid and often transient as many genes that had become  
530 induced by one hour of surface attachment exhibited subsequent decreases in expression by four  
531 hours of attachment. By eight hours of attachment many of these genes exhibited continued  
532 decreases in expression while others only then became induced. Interestingly, we found similar  
533 functional genes in *P. syringae* to be up-regulated soon after cells attached to a surface, including  
534 *emrB* encoding a drug resistance transporter as well as other genes in this operon, and *glnH*,  
535 involved in the transport of glutamine (Fig S4). The gene *marA*, involved in resistance to a  
536 variety of antimicrobial compounds and *marR* encoding its regulator as well as *ahpF*, *grxA*, and  
537 *katG* and their regulator *oxyR*, collectively mediating oxidative stress tolerance were also up-  
538 regulated in both systems (Fig S4). Genes involved in attachment and DNA repair were up-  
539 regulated in response to attachment in both systems as well. Taken together, these results suggest  
540 that both *E. coli* and *P. syringae* experience chemical stresses to which these defensive responses  
541 are necessary soon after mobilization on surfaces. Alternatively, surface attachment is taken as a  
542 cue to alert cells that they have arrived at a surface upon which such chemical stresses could be  
543 anticipated. *E. coli* can experience chemical stresses associated with innate resistance responses  
544 of animal cells [51] as well as plants [37, 39]. Likewise, *P. syringae* experiences defensive  
545 chemicals as well as oxidative stress in both compatible and incompatible host plants [38, 52]  
546 and induces defensive genes in response [26]. Our work suggests that many such traits might be  
547 induced in *P. syringae* merely upon contact with the leaf surface itself. Thus, stress response  
548 traits, presumably less important in an open, aquatic environment, are rapidly induced in both *P.*  
549 *syringae* and *E. coli*. when host defenses might otherwise prove lethal.

---

550 In another study, Siryaporn *et al.* [31] examined rapid differential expression of genes in  
551 *Pseudomonas aeruginosa* UCBPP-PA14 one hour after attaching to a surface, finding that *pilYI*  
552 plays a central role in its surface-dependent induction of virulence and that the expression of  
553 many genes was rapidly changed. Despite finding little surface-mediated induction of this  
554 homolog in *P. syringae*, the homologs of several other genes were found to be induced in *P.*  
555 *syringae* (Figs S4, S5, S6, S7). Among these genes were those involved in flagellar synthesis and  
556 motility. A variety of genes involved in cell wall synthesis also exhibited similar regulatory  
557 responses to surfaces in both bacteria. The genes *mraY* and *murA*, involved in peptidoglycan  
558 synthesis, as well as *lpxC* and *lpxD*, involved in LPS synthesis, were induced upon  
559 immobilization of both *P. syringae* and *P. aeruginosa* (Fig S7), suggesting that cell wall damage  
560 is common upon interacting with surfaces [8, 30, 53]. Likewise, *ispZ*, involved in cell division,  
561 was also induced on surfaces in both studies (Fig S7). It thus appears that there are many  
562 common features of the initial interaction of a variety of bacteria taxa with surfaces, and that the  
563 nature of the surface with which they interact may play a subservient role in dictating such  
564 responses. A better understanding of the initial interaction of bacteria with surfaces hopefully  
565 will lead to better manage their interactions in both agricultural and biomedical settings [12].

566

## 567 **Acknowledgements**

568 We thank Kevin Hockett and Gwyn Beattie for providing the gene functional category  
569 assignments for *Pseudomonas syringae* B728a. We also thank Rebecca Mackelprang and Ke Bi  
570 for their assistance with R to analyze RNA sequencing results. We also thank Steven Ruzin and  
571 Denise Schichnes for assistance in Biological Imaging. This work used the Vincent J. Coates

572 Genomics Sequencing Laboratory at UC Berkeley, supported by NIH S10 OD018174

573 Instrumentation Grant.

574

## 575 **References**

- 
- 576 1. Morris CE, Sands DC, Vinatzer BA, Glaux C, Guilbaud C, Buffière A, et al. The life  
577 history of the plant pathogen *Pseudomonas syringae* is linked to the water cycle. *ISME J.*  
578 2008; 2(3): 321-334.
- 579 2. Leveau JH, Lindow SE. Appetite of an epiphyte: quantitative monitoring of bacterial  
580 sugar consumption in the phyllosphere. *Proc Natl Acad Sci U S A.* 2001; 98(6): 3446-  
581 3453.
- 582 3. Lindow SE, Brandl MT. Microbiology of the phyllosphere. *Appl Environ Microbiol.*  
583 2003; 69(4): 1875-1883.
- 584 4. Berti AD, Greve NJ, Christensen QH, Thomas MG. Identification of a biosynthetic gene  
585 cluster and the six associated lipopeptides involved in swarming motility of  
586 *Pseudomonas syringae* pv. tomato DC3000. *J Bacteriol.* 2007; 189(17): 6312-6323.
- 587 5. Burch AY, Zeisler V, Yokota K, Schreiber L, Lindow SE. The hygroscopic biosurfactant  
588 syringafactin produced by *Pseudomonas syringae* enhances fitness on leaf surfaces  
589 during fluctuating humidity. *Environ Microbiol.* 2014; 16(7): 2086-2098.
- 590 6. Hernandez MN, Lindow SE. *Pseudomonas syringae* increases water availability in leaf  
591 microenvironments via production of hygroscopic syringafactin. *Appl Environ Microbiol.*  
592 2019; 85: e01014-19.
- 593 7. Burch AY, Browne PJ, Dunlap CA, Price NP, Lindow SE. Comparison of biosurfactant  
594 detection methods reveals hydrophobic surfactants and contact-regulated  
595 production. *Environ Microbiol.* 2011; 13(10): 2681-2691.
- 596 8. Chang CY. Surface sensing for biofilm formation in *Pseudomonas aeruginosa*. *Front*  
597 *Microbiol.* 2008; 8(2671). doi: 10.3389/fmicb.2017.02671.
- 598 9. Kearns DB. A field guide to bacterial swarming motility. *Nat Rev Microbiol.* 2010; 8:  
599 634-644.
- 600 10. O'Toole GA, Wong GCL. Sensational biofilms: surface sensing in bacteria. *Curr Opin*  
601 *Microbiol.* 2016; 30: 139-146.

- 602 11. Petrova O, Sauer K. Sticky situations: key components that control bacterial surface  
603 attachment. *J Bacteriol.* 2012; 194: 2413-2425.
- 604 12. Tuson HH, Weibel DB. Bacteria-surface interactions. *Soft Matter.* 2013; 9(18): 4368-  
605 4380.
- 606 13. Bhomkar P, Materi W, Semenchenko V, Wishart DS. Transcriptional response of *E. coli*  
607 upon FimH-mediated fimbrial adhesion. *Gene Regul Syst Bio.* 2010; 4: 1-17.
- 608 14. King E, Ward M, Raney D. Two simple media for the demonstration of pyocyanin and  
609 fluorescin. *J Lab Clin Med.* 1954; 44(2): 301–307.
- 610 15. Afgan E, Baker D, Batut B, van den Beek M, Bouvier D, Čech M, et al. The Galaxy  
611 platform for accessible, reproducible and collaborative biomedical analyses: 2018 update.  
612 *Nucleic Acids Res.* 2018; 46: W537-W544.
- 613 16. Bolger AM, Lohse M, Usadel B. Trimmomatic: A flexible trimmer for Illumina sequence  
614 data. *Bioinform.* 2014; 30(15): 2114-20.
- 615 17. Feil H, Feil WS, Chain P, Larimer F, DiBartolo G, Copeland A, et al. Comparison of the  
616 complete genome sequences of *Pseudomonas syringae* pv. *syringae* B728a and pv.  
617 tomato DC3000. *Proc Natl Acad Sci U S A.* 2005; 102(31): 11064-11069.
- 618 18. Patro R, Duggal G, Love MI, Irizarry RA, Kingsford C. Salmon provides fast and bias-  
619 aware quantification of transcript expression. *Nat Methods.* 2017; 14: 417-419.
- 620 19. Robinson MD, McCarthy DJ, Smyth GK. edge R: a Bioconductor package for  
621 differential expression analysis of digital gene expression data. *Bioinform.* 2010; 26(1):  
622 139-140.
- 623 20. Robinson MD, Oshlack A. A scaling normalization method for differential expression  
624 analysis of RNA-seq data. *Genome Biol.* 2010; 11: R25. doi: 10.1186/gb-2010-11-3-r25.
- 625 21. R Core Team. R: A language and environment for statistical computing. R Foundation  
626 for Statistical Computing, Vienna, Austria. 2020; <https://www.R-project.org/>.
- 627 22. Castillo-Davis CI, Hartl DL. GeneMerge - post-genomic analysis, data mining, and  
628 hypothesis testing. *Bioinform.* 2003; 19(7): 891-892.
- 629 23. Bonferroni CE. Teoria statistica delle classi e calcolo delle probabilit `a. Pubblicazioni  
630 del R Istituto Superiore di Scienze Economiche e Commerciali di Firenze. 1936; 8:3-62.
- 631 24. Benjamini Y, Hochberg Y. Controlling the false discovery rate: a practical and  
632 powerful approach to multiple hypothesis testing. *J R Stat Soc B.* 1995; 57:289-300.  
633

- 634 25. Loper JE, Lindow SE. Lack of evidence for in situ fluorescent pigment production by  
635 *Pseudomonas syringae* pv. *syringae* on bean leaf surfaces. *Phytopathol.* 1987; 77: 1449-  
636 1454.
- 637 26. Yu X, Lund SP, Scott RA, Greenwald JW, Records AH, Nettleton D, et al.  
638 Transcriptional responses of *Pseudomonas syringae* to growth in epiphytic versus  
639 apoplastic leaf sites. *Proc Natl Acad Sci U S A.* 2013; E425-E434.
- 640 27. Dötsch A, Eckweiler D, Schniederjans M, Zimmermann A, Jensen V, Scharfe M, et al.  
641 The *Pseudomonas aeruginosa* transcriptome in planktonic cultures and static biofilms  
642 using RNA sequencing. *PLOS ONE.* 2012; 7(2): e31092. doi:  
643 10.1371/journal.pone.0031092.
- 644 28. Hickman JW, Tifrea DF, Harwood CS. A chemosensory system that regulates biofilm  
645 formation through modulation of cyclic diguanylate levels. *Proc Natl Acad Sci U S A.*  
646 2005; 102(40): 14422-14427.
- 647 29. Pringent-Combaret C, Vidal O, Dorel C, Lejeune P. Abiotic surface sensing and biofilm-  
648 dependent regulation of gene expression in *Escherichia coli*. *J Bacteriol.* 1999; 181(19):  
649 5993-6002.
- 650 30. Otto K, Silhavy TJ. Surface sensing and adhesion of *Escherichia coli* controlled by the  
651 Cpx-signaling pathway. *Proc Natl Acad Sci U S A.* 2002; 99(4): 2287-2292.
- 652 31. Siryaporn A, Kuchma SL, O'Toole GA, Gitai Z. Surface attachment induces  
653 *Pseudomonas aeruginosa* virulence. *Proc Natl Acad Sci U S A.* 2014; 111(47): 16860-  
654 16865.
- 655 32. Wood LF, Leech AJ, Ohman DE. Cell wall-inhibitory antibiotics activate the alginate  
656 biosynthesis operon in *Pseudomonas aeruginosa*: Roles of  $\sigma^{22}$  (AlgT) and the AlgW and  
657 Prc proteases. *Mol Microbiol.* 2006; 62(2): 412-426.
- 658 33. Wood LF, Ohman DE. Use of cell wall stress to characterize  $\sigma^{22}$  (AlgT/U) activation by  
659 regulated proteolysis and its regulon in *Pseudomonas aeruginosa*. *Mol Microbiol.* 2009;  
660 72(1): 183-201.
- 661 34. Melotto M, Underwood W, He SY. Role of stomata in plant innate immunity and foliar  
662 bacterial diseases. *Annu Rev Phytopathol.* 2008; 46: 101-122.
- 663 35. Remus-Emsermann MNP, Leveau JHJ. Linking environmental heterogeneity and  
664 reproductive success at single-cell resolution. *The ISME Journal.* 2010; 4: 215-222.
- 665 36. Remus-Emsermann MNP, Tecon R, Kowalchuk GA, Leveau JHJ. Variation of local  
666 carrying capacity and the individual fate of bacterial colonizers in the phyllosphere.  
667 *ISME J.* 2012; 6: 756-765.

- 668 37. Dublan MA, Ortiz-Marquez JCF, Lett L, Curatti L. Plant-adapted *Escherichia coli* show  
669 increased lettuce colonizing ability, resistance to oxidative stress and chemotactic  
670 response. PLOS ONE. 2014; 9(10): e110416. doi: 10.1371/journal.pone.0110416.
- 671 38. Fones H, Preston GM. Reactive oxygen and oxidative stress tolerance in plant pathogenic  
672 *Pseudomonas*. FEMS Microbiol Lett. 2012; 327(1): 1-8.
- 673 39. Kyle JL, Parker CT, Goudeau D, Brandl MT. Transcriptome analysis of *Escherichia coli*  
674 O157:H7 exposed to lysates of lettuce leaves. Appl Environ Microbiol. 2010; 76(5):  
675 1375-1387.
- 676 40. Joyner DC, Lindow SE. Heterogeneity of iron bioavailability on plants assessed with a  
677 whole-cell GFP-based bacterial biosensor. Microbiol. 2000; 146: 2435-2445.
- 678 41. Temple TN, Stockwell VO, Loper JE, Johnson VB. Bioavailability of Iron to  
679 *Pseudomonas fluorescens* Strain A506 on Flowers of Pear and Apple. Phytopathol. 2004;  
680 94: 1286-1294.  
681
- 682 42. Dulla GM, Marco M, Quiñones B, Lindow SE. A closer look at *Pseudomonas syringae*  
683 as a leaf colonist. ASM News. 2005; 71: 469-475.
- 684 43. Haefele DM, Lindow SE. Flagellar motility confers epiphytic fitness advantages upon  
685 *Pseudomonas syringae*. Appl Environ Microbiol. 1987; 53: 2528-2533.  
686
- 687 44. Axtell CA, Beattie GA. Construction and characterization of a *proU-gfp* transcriptional  
688 fusion that measures water availability in a microbial habitat. Appl Environ Microbiol.  
689 2002; 68(9): 4604-4612.
- 690 45. Beattie GA. Water relations in the interaction of foliar bacterial pathogens with plants.  
691 Annu Rev Phytopathol. 2011; 49: 533-55.
- 692 46. Banerjee S, Bhattacharya S. Compressive textural attributes, opacity and syneresis of gels  
693 prepared from gellan, agar and their mixtures. J Food Eng. 2011; 102: 287-292.
- 694 47. Hess DF, Foy CL. Interaction of surfactants with plant cuticles. Weed Technol. 2000;  
695 14(4): 807-813.  
696
- 697 48. Hirano SS, Upper CD. Bacteria in the leaf ecosystem with emphasis on *Pseudomonas*  
698 *syringae* - a pathogen, ice nucleus, and epiphyte. Microbiol Mol Bio Rev. 2000; 64(3):  
699 624-653.  
700
- 701 49. Wilson M, Hirano SS, Lindow SE. Location and survival of leaf-associated bacteria in  
702 relation to pathogenicity and potential for growth within the leaf. Appl Environ Microbiol  
703 1999; 65: 1435-1443.



- 704 50. Mo YY, Gross DC. Plant signal molecules activate the *syrB* gene, which is required for  
705 syringomycin production by *Pseudomonas syringae* pv. *syringae*. J Bacteriol. 1991;  
706 173(18): 5784-5792.  
707
- 708 51. Tagkopoulos I, Liu YC, Tavazoie S. Predictive behavior within microbial genetic  
709 networks. Science. 2008; 320: 1313-1317.  
710
- 711 52. Alcalde-Rico M, Hernando-Amado S, Blanco P, Martinez JL. Multidrug efflux pumps at  
712 the crossroad between antibiotic resistance and bacterial virulence. Front Microbiol.  
713 2016; 7: 1483. doi: 10.3389/fmicb.2016.01483.  
714
- 715 53. Vogt SL, Raivio TL. Just scratching the surface: an expanding view of the Cpx envelope  
716 stress response. FEMS Microbiol Lett. 2012; 326(1): 2-11.

717

## 718 **Supporting Information**

719 **Figure S1. Number of sequencing reads.** Number of sequencing reads obtained for the various  
720 replicate samples of *Pseudomonas syringae* B728a cells recovered 2 hours after application to  
721 filters or from cells in broth cultures used to inoculate the filters.

722 **Figure S2. Distribution of number of sequencing reads.** Distribution of number of sequencing  
723 reads assigned to a given gene following RNA sequencing of *Pseudomonas syringae* B728a cells  
724 recovered 2 hours after application to filters or from cells in broth cultures used to inoculate the  
725 filters.

726 **Figure S3. Smear plot documenting the differential expression of genes in *Pseudomonas***  
727 ***syringae* B728a.** Smear plot documenting the differential expression of genes in *Pseudomonas*  
728 *syringae* B728a 2 hours after inoculation onto filter surfaces compared to that in planktonic cells  
729 as a function of their levels of expression. Shown is the proportion of the genes that were  
730 differentially expressed on the filter surface (red) and those not differentially expressed on a  
731 surface (black).

732 **Figure S4. Comparison of differential expression of homologs of genes in *Pseudomonas***  
733 ***syringae* B728a and in *E. coli* CSH50.** Comparison of differential expression of homologs of  
734 genes in *Pseudomonas syringae* B728a 2 hours after application to membrane surfaces and of *E.*  
735 *coli* CSH50 1 hour after attachment to mannose agarose beads in the study of Bhomkar *et al.*  
736 (2010). Differential up-regulation of genes is shown in green, down-regulation is depicted in red,  
737 and no change in expression is shown in yellow.

738 **Figure S5. Relationship between magnitude (fold-change) of differential expression of gene**  
739 **homologs in *Pseudomonas syringae* B728a and in *E. coli* CSH50.** Relationship between  
740 magnitude (fold-change) of differential expression of gene homologs in *Pseudomonas syringae*  
741 B728a 2 hours after transfer to a filter surface and that of *E. coli* CSH50 1 hour after attachment  
742 on agarose beads in the study of Bhomkar *et al.* (2010).

743 **Figure S6. Comparison of the number of gene homologs in *Pseudomonas syringae* B728a**  
744 **and in *Pseudomonas aeruginosa* UCBPP-PA14.** Comparison of the number of gene homologs  
745 in *Pseudomonas syringae* B728a (blue) and *Pseudomonas aeruginosa* UCBPP-PA14 (red) that  
746 were up-regulated when transferred to filter surfaces for 2 hours or were attached to a glass  
747 surface for 1 hour in the study of Siryaporn *et al.* (2014), respectively. Using the hypergeometric  
748 distribution, this overlap was determined to be significant with a p-value of 1.65E-05 (Castillo-  
749 Davis and Hartl, 2003).

750 **Figure S7. Comparison of differential expression of homologs of genes in *Pseudomonas***  
751 ***syringae* B728a and in *Pseudomonas aeruginosa* UCBPP-PA14.** Comparison of differential  
752 expression of homologs of genes in *Pseudomonas syringae* B728a 2 hours after application to  
753 membrane surfaces and of *Pseudomonas aeruginosa* UCBPP-PA14 wild-type cells attached to a  
754 glass surface for 1 hour in the study of Siryaporn *et al.* (2014). Differential up-regulation of

755 genes is shown in green, down-regulation is depicted in red, and no change in expression is  
756 shown in yellow.

---

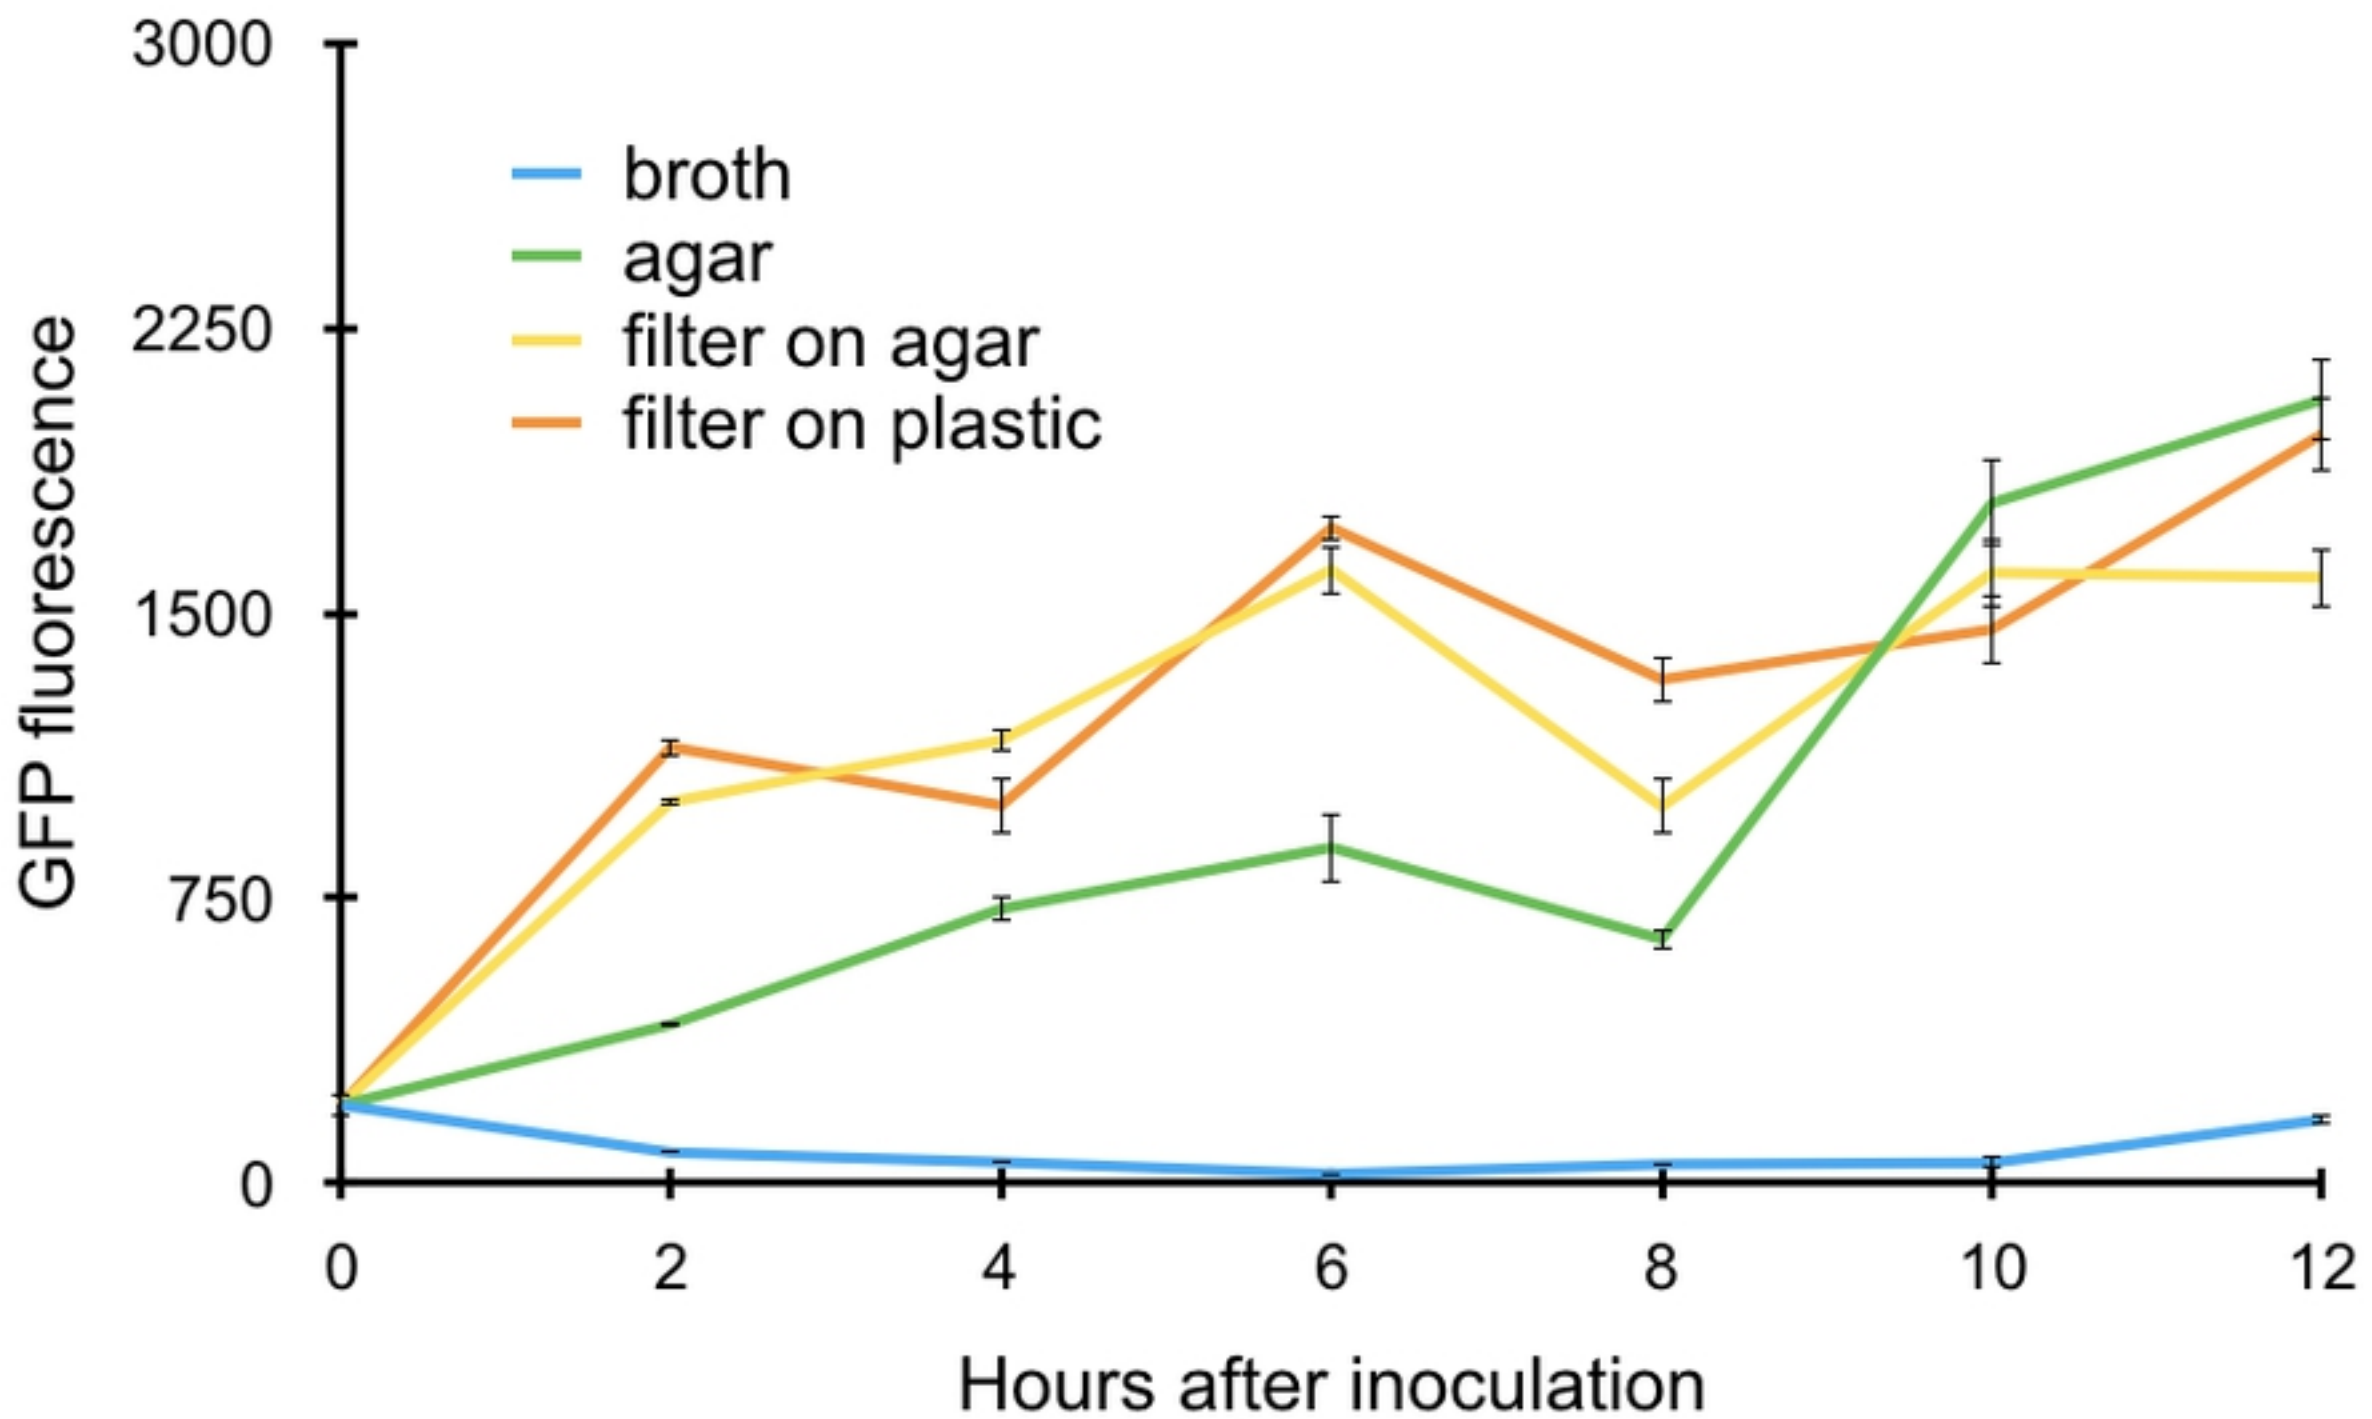

Figure

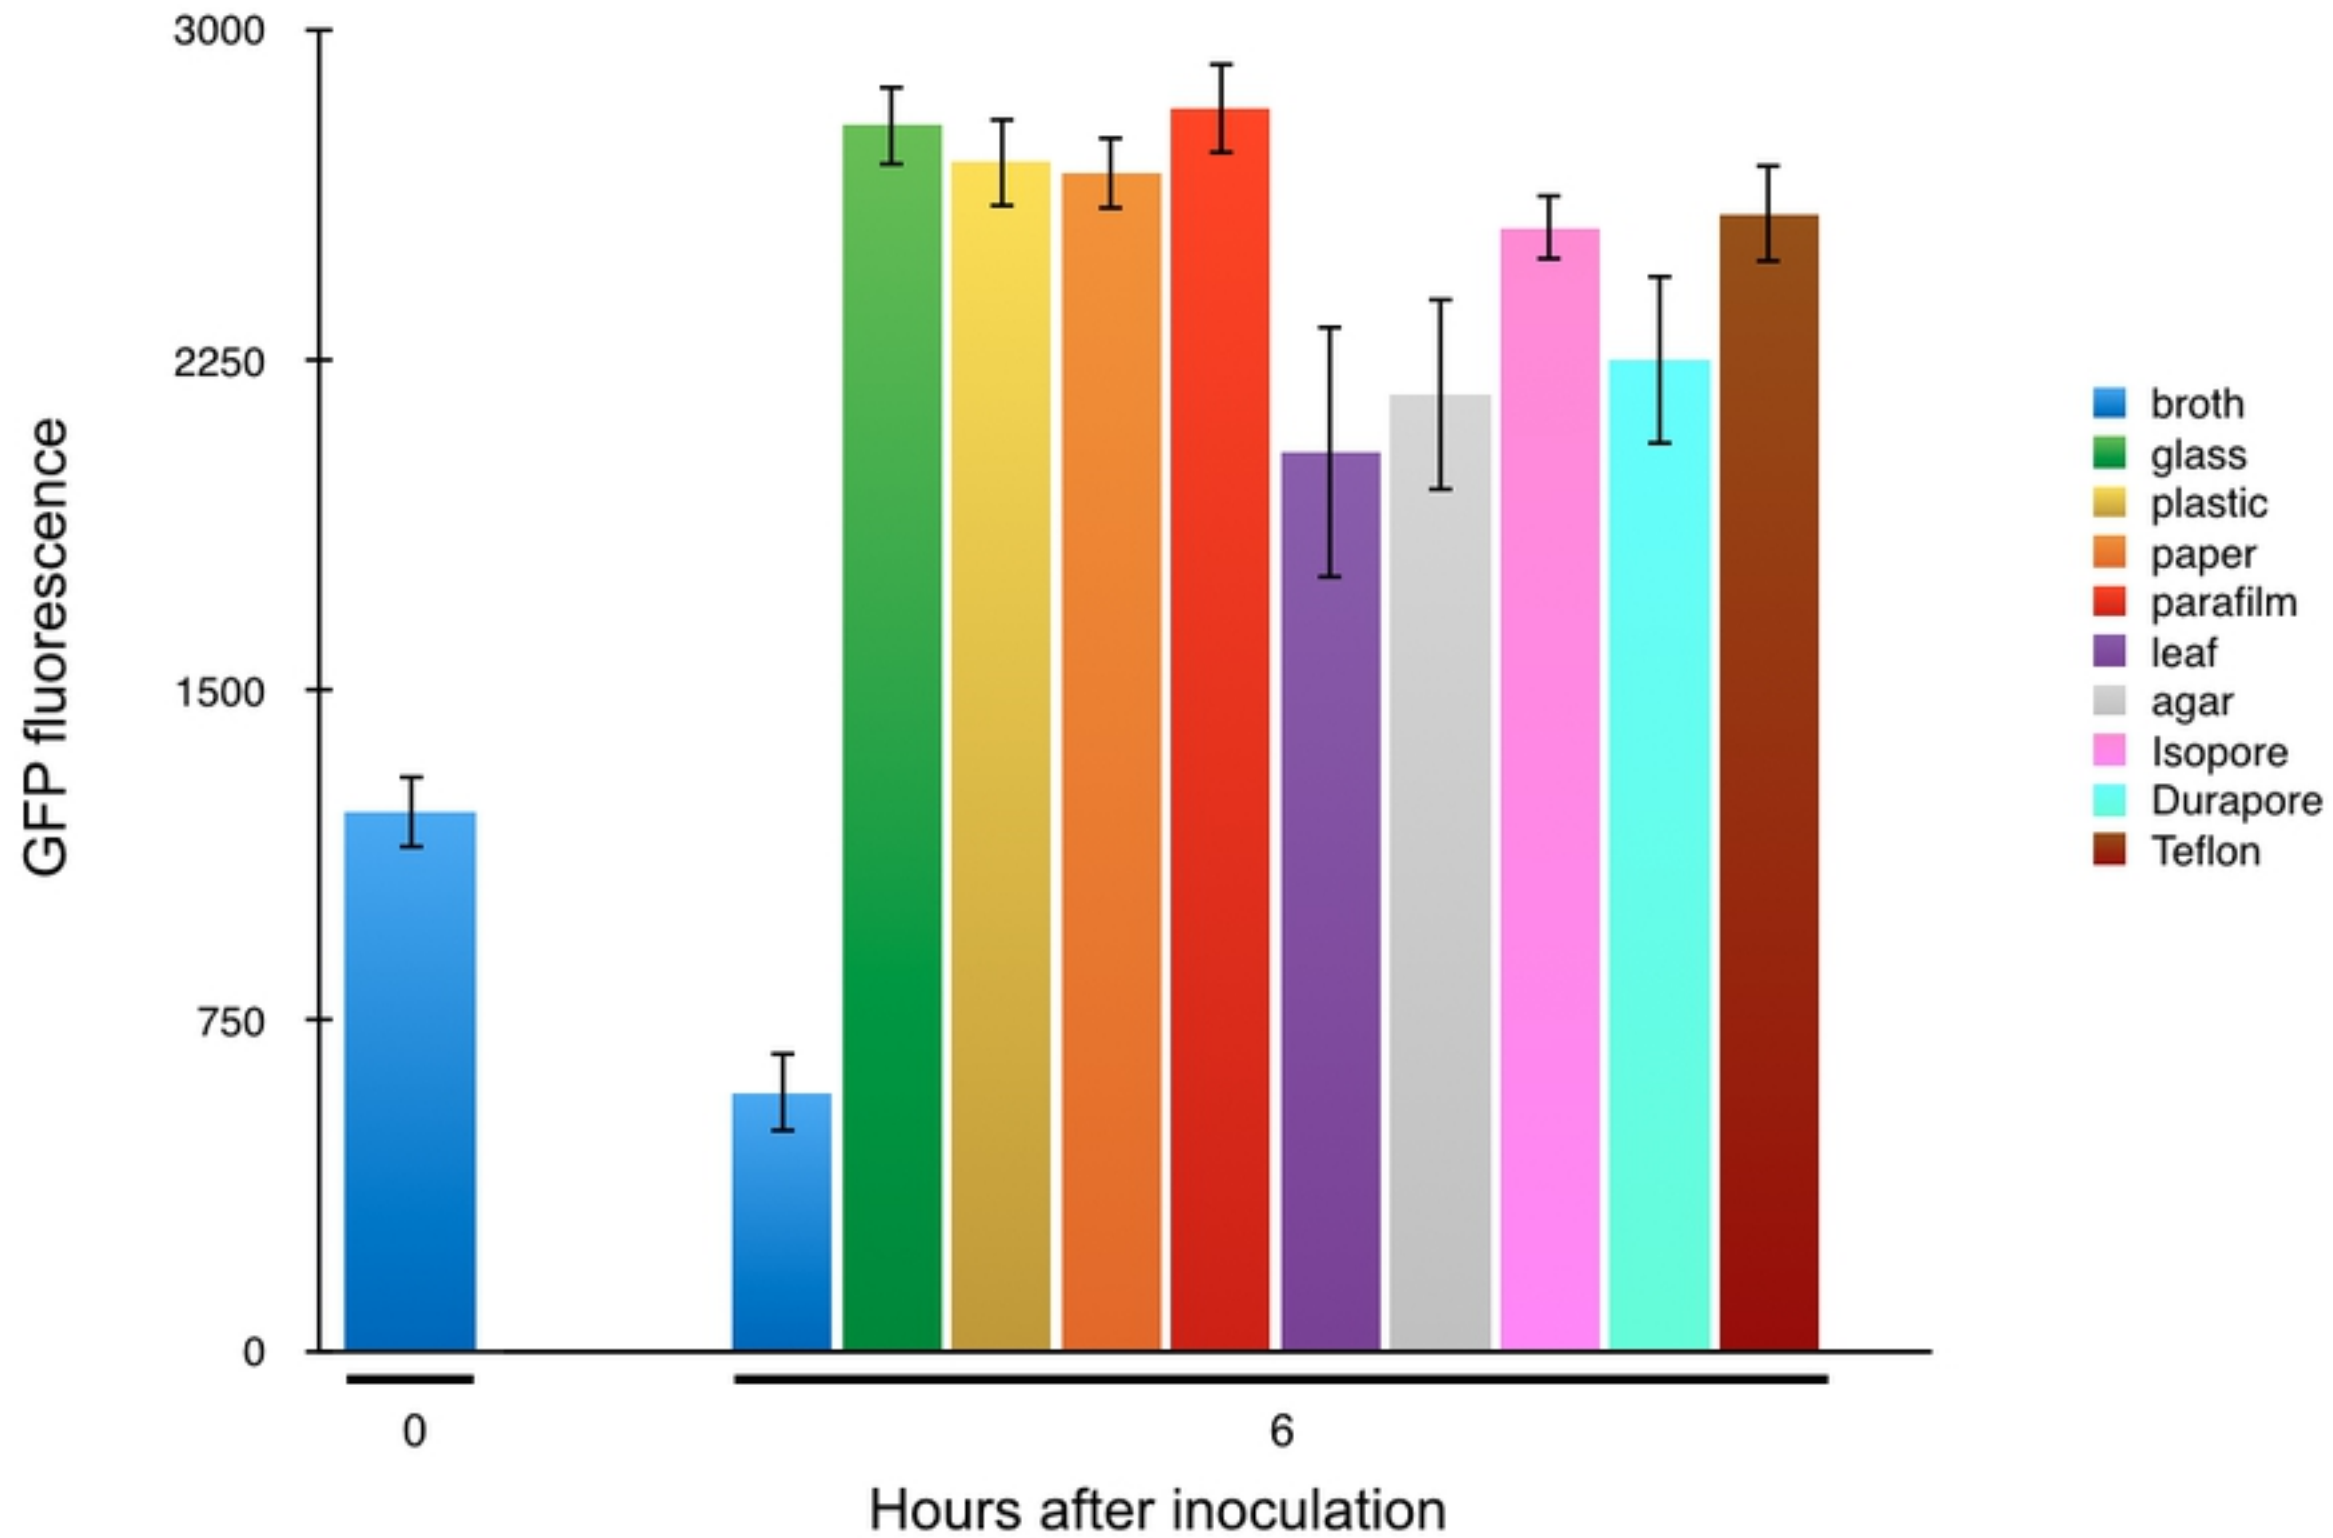

Figure

**■ = down-regulated genes**

**■ = up-regulated genes**

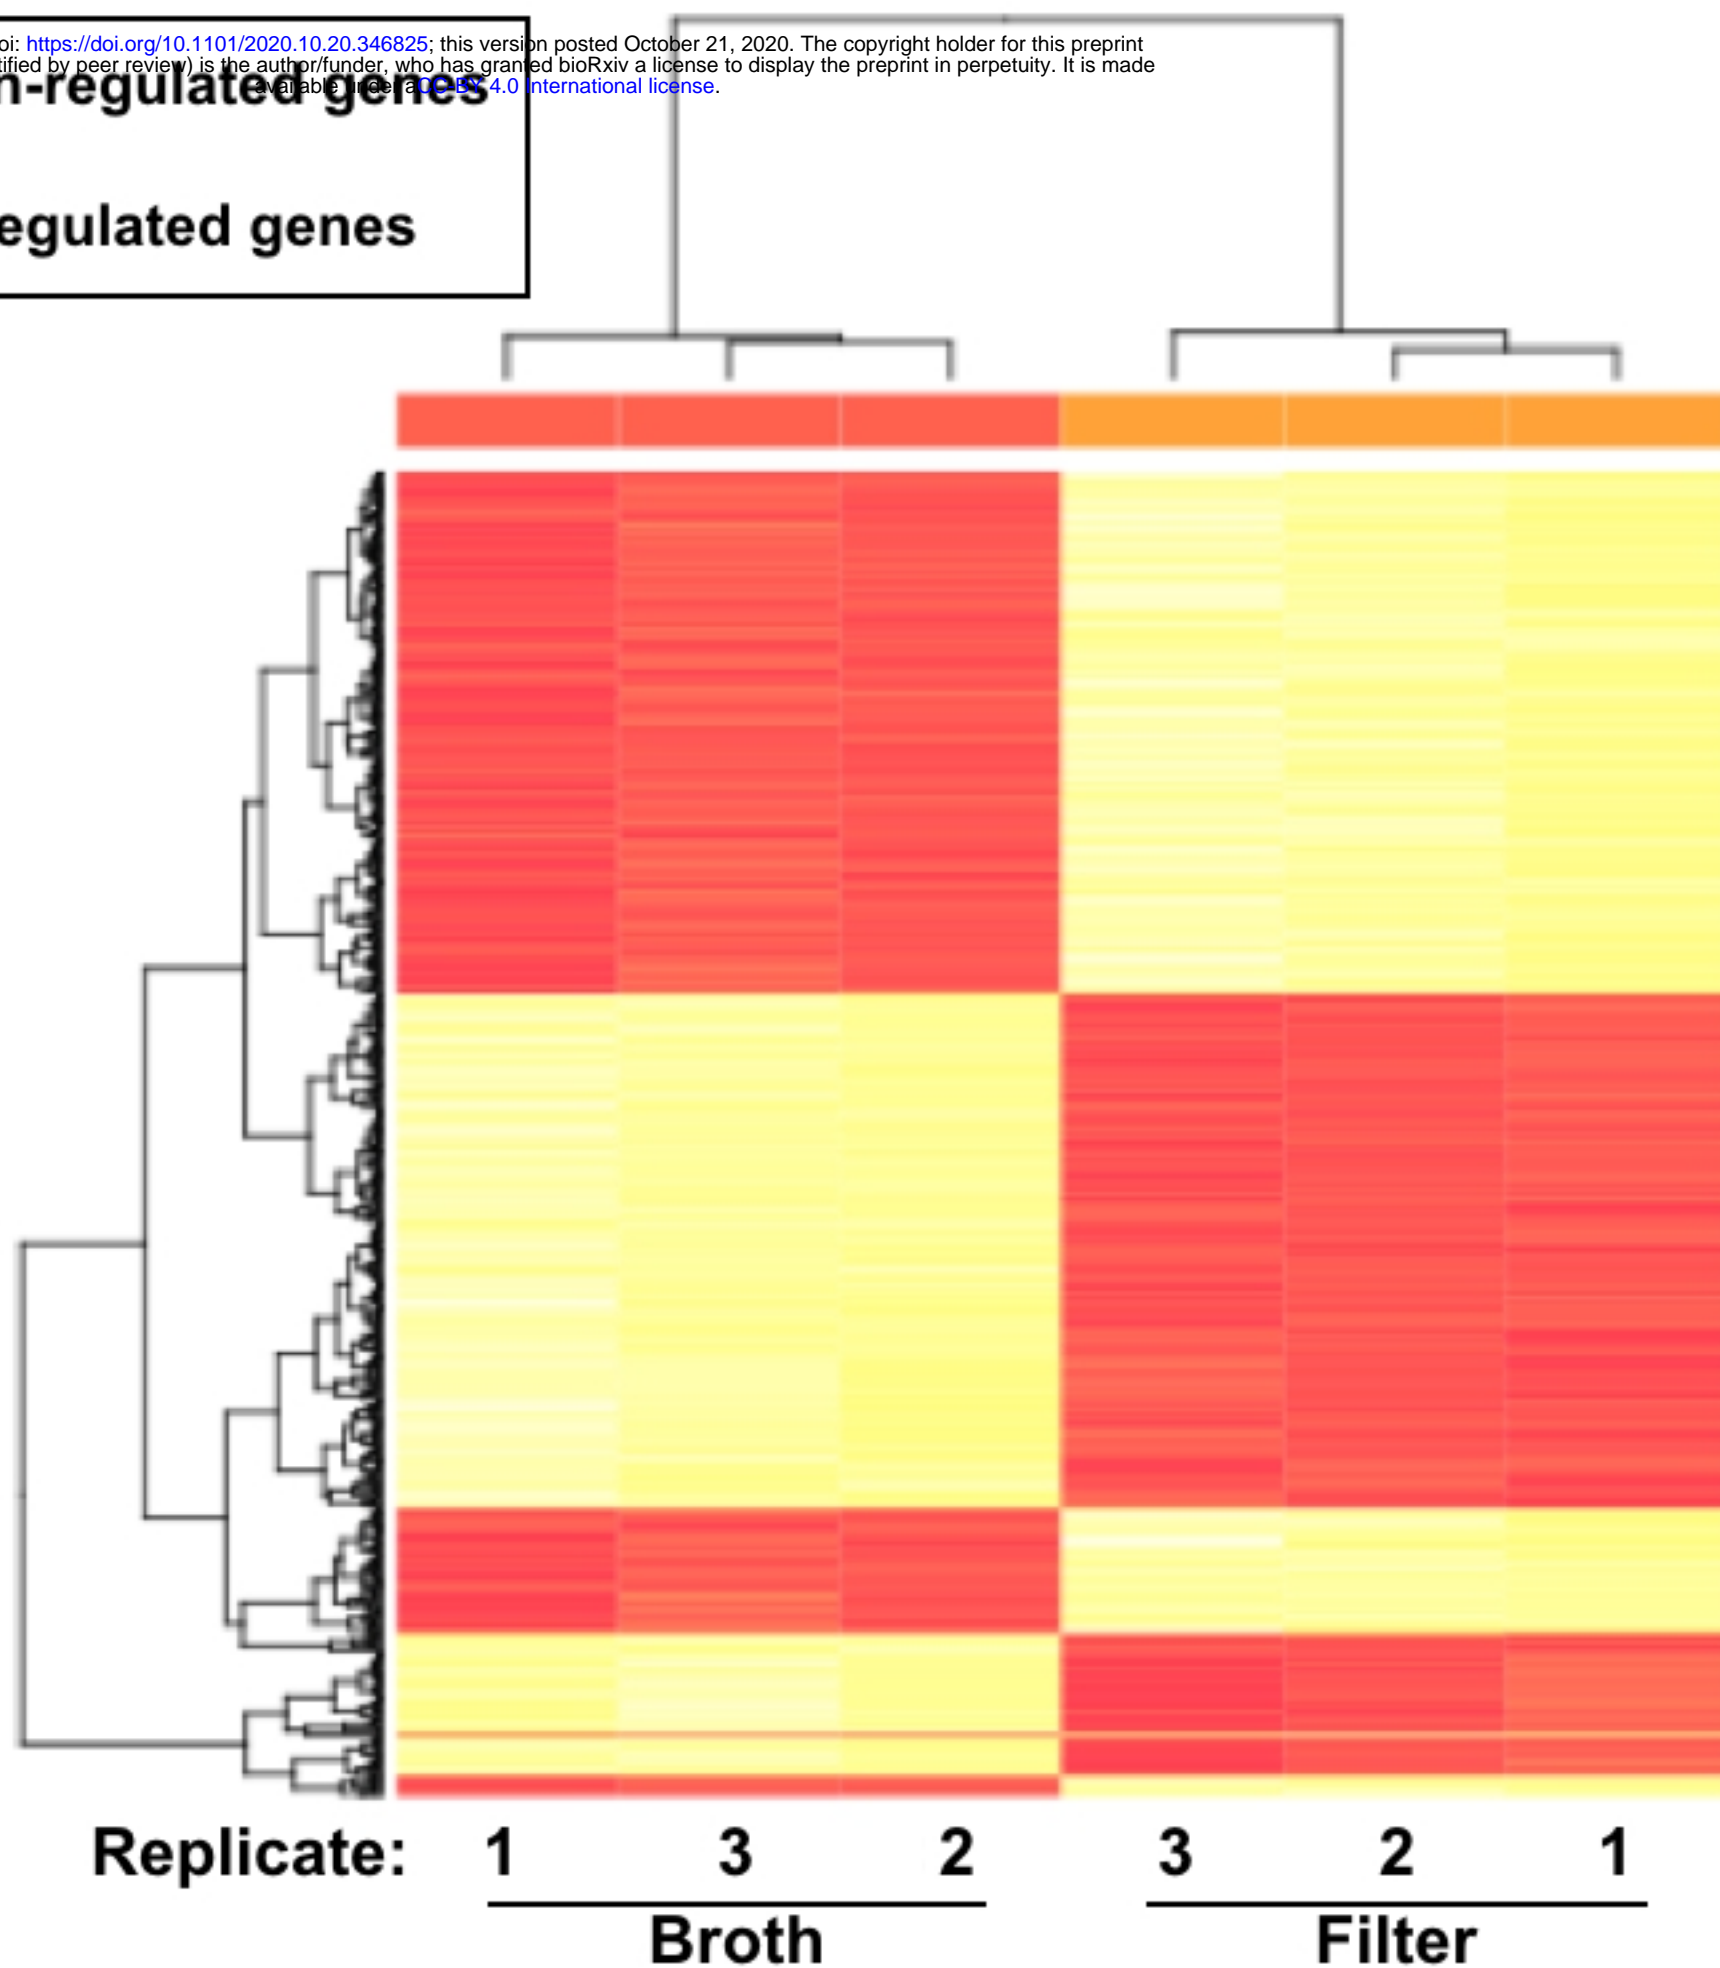

Figure

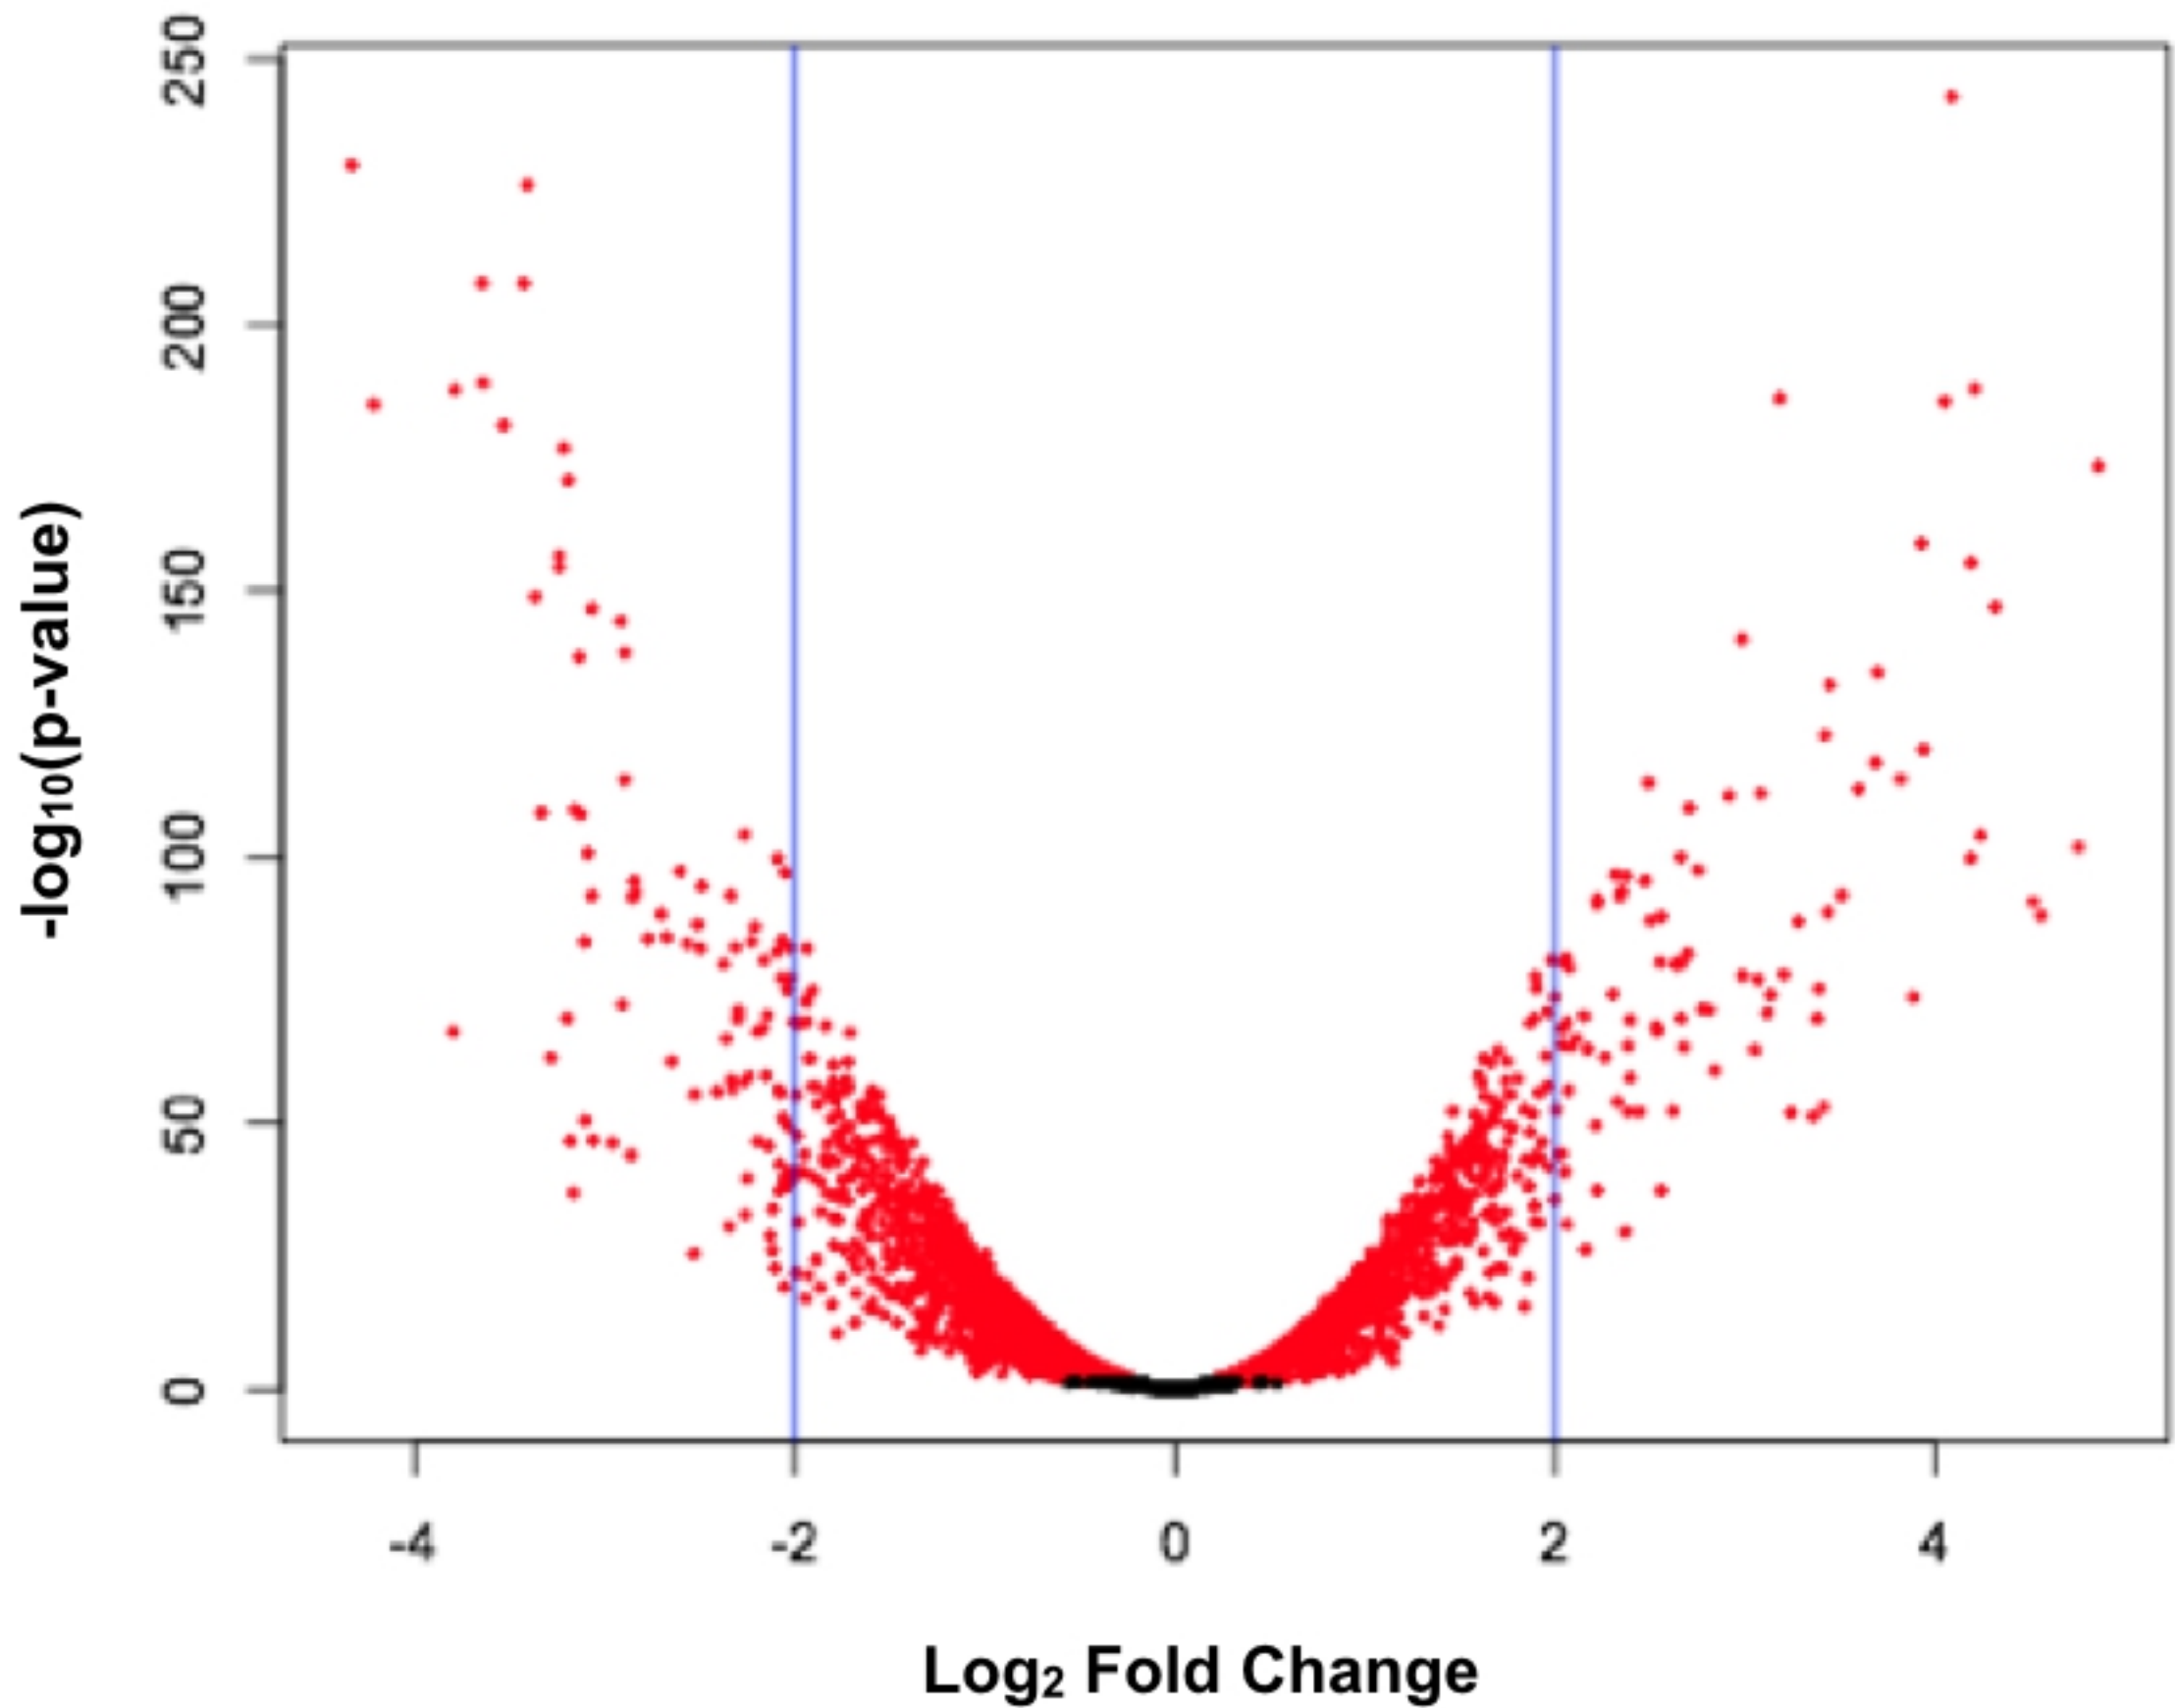

Figure
